# Supplementary material for: Efficient synthesis of novel spiro-furo-pyrido-pyrimidine-indolines by manganese ferrite nanoparticles as a highly active magnetically reusable nanocatalyst in water
Source: Royal Society of Chemistry journal article supplement (doi:10.1039/c3nj00940h), 2013-10-17
Supplement: c3nj00940h.pdf [file c3nj00940h.pdf]

## Efficient synthesis of novel spiro-furo-pyrido-pyrimidine-indolines by manganese ferrite nanoparticles as a highly active magnetically reusable nanocatalyst in water

H. Naeimi,<sup>a</sup> Z. Rashid,<sup>a</sup> A. H. Zarnani,<sup>b</sup> and R. Ghahremanzadeh<sup>c\*</sup>

<sup>a</sup>Department of Organic Chemistry, Faculty of Chemistry, University of Kashan, Kashan, 87317, I.R. Iran.

<sup>b</sup>Reproductive Immunology Research Center, Avicenna Research Institute, Academic Center for Education, Culture and Research (ACECR), Tehran, Iran.

<sup>c</sup>Nanobiotechnology Research Center, Avicenna Research Institute, Academic Center for Education, Culture and Research (ACECR), Tehran, Iran.

E-mail: [r.ghahremanzadeh@avicenna.ac.ir](mailto:r.ghahremanzadeh@avicenna.ac.ir)

### SUPPORTING INFORMATION

| <i>List of contents</i>                                                                 | <i>Page</i> | <i>List of contents</i>          | <i>Page</i> |
|-----------------------------------------------------------------------------------------|-------------|----------------------------------|-------------|
| Title, author's name, address                                                           | <b>1</b>    | <sup>13</sup> C NMR of <b>4f</b> | <b>21</b>   |
| General methods and characterization data                                               | <b>2-9</b>  | <sup>1</sup> H NMR of <b>4g</b>  | <b>22</b>   |
| XRD pattern of MnFe <sub>2</sub> O <sub>4</sub> nanoparticles ( <b>S1</b> )             | <b>3</b>    | <sup>13</sup> C NMR of <b>4g</b> | <b>23</b>   |
| Magnetization curve for the prepared nanoMnFe <sub>2</sub> O <sub>4</sub> ( <b>S2</b> ) | <b>3</b>    | <sup>1</sup> H NMR of <b>4h</b>  | <b>24</b>   |
| TEM image of nanoMnFe <sub>2</sub> O <sub>4</sub> ( <b>S3</b> )                         | <b>3</b>    | <sup>1</sup> H NMR of <b>4i</b>  | <b>25</b>   |
| <sup>1</sup> H NMR of <b>4a</b>                                                         | <b>10</b>   | <sup>13</sup> C NMR of <b>4i</b> | <b>26</b>   |
| <sup>13</sup> C NMR of <b>4a</b>                                                        | <b>11</b>   | <sup>1</sup> H NMR of <b>4j</b>  | <b>27</b>   |
| <sup>1</sup> H NMR of <b>4b</b>                                                         | <b>12</b>   | <sup>1</sup> H NMR of <b>4k</b>  | <b>28</b>   |
| <sup>13</sup> C NMR of <b>4b</b>                                                        | <b>13</b>   | <sup>13</sup> C NMR of <b>4k</b> | <b>29</b>   |
| <sup>1</sup> H NMR of <b>4c</b>                                                         | <b>14</b>   | <sup>1</sup> H NMR of <b>4l</b>  | <b>30</b>   |
| <sup>13</sup> C NMR of <b>4c</b>                                                        | <b>15</b>   |                                  |             |
| <sup>1</sup> H NMR of <b>4d</b>                                                         | <b>16</b>   |                                  |             |
| <sup>13</sup> C NMR of <b>4d</b>                                                        | <b>17</b>   |                                  |             |
| <sup>1</sup> H NMR of <b>4e</b>                                                         | <b>18</b>   |                                  |             |
| <sup>13</sup> C NMR of <b>4e</b>                                                        | <b>19</b>   |                                  |             |
| <sup>1</sup> H NMR of <b>4f</b>                                                         | <b>20</b>   |                                  |             |

## Experimental Part

**General.** The chemicals used in this work were obtained from Fluka and Merck and were used without purification. Melting points were measured on an Electrothermal 9200 apparatus. Mass spectra were recorded on a Shimadzu QP 1100 Ex mass spectrometer operating at an ionization potential of 70 eV. IR spectra were recorded as KBr pellets on a Perkin-Elmer 781 spectrophotometer and an Impact 400 Nicolet FT-IR spectrophotometer.  $^1\text{H}$  NMR and  $^{13}\text{C}$  NMR spectra were recorded in DMSO- $d_6$  solvents on a Bruker DRX-400 spectrometer with tetramethylsilane as internal reference. The elemental analyses (C, H, N) were obtained from a Carlo ERBA Model EA 1108 analyzer. X-ray diffraction (XRD) pattern of the as-synthesized material was obtained using a Holland Philips Xpert X-ray powder diffraction (XRD) diffractometer (CuK $\alpha$  radiation,  $\lambda = 0.154056$  nm), at a scanning speed of  $2^\circ/\text{min}$  from  $10^\circ$  to  $100^\circ$  ( $2\theta$ ). The nanocatalyst was determined using a Philips EM 208 transmission electron microscope (TEM) operated at a 100 kV accelerating voltage. The purity determination of the substrates and reaction monitoring were accomplished by TLC on silica-gel polygram SILG/UV 254 plates (from Merck Company).

### Typical experimental procedure for the preparation of catalyst

$\text{MnFe}_2\text{O}_4$  nanoparticles have been prepared following the reported standard protocol by co-precipitation of  $\text{MnCl}_2$  and  $\text{FeCl}_3$  in water in the presence of sodium hydroxide. Briefly,  $\text{MnCl}_2 \cdot 4\text{H}_2\text{O}$  and  $\text{FeCl}_3 \cdot 6\text{H}_2\text{O}$  were taken in molar ratio of  $\text{Mn}^{2+}:\text{Fe}^{3+} = 1:2$  to prepare  $0.3 \text{ mol} \cdot \text{L}^{-1}$  metal ion solution of 100 ml containing  $0.1 \text{ mol} \cdot \text{L}^{-1}$   $\text{Mn}^{2+}$  and  $0.2 \text{ mol} \cdot \text{L}^{-1}$   $\text{Fe}^{3+}$ , then was slowly dropped into 100 ml NaOH solution of  $3 \text{ mol} \cdot \text{L}^{-1}$  at the preheated temperature of  $95^\circ\text{C}$ . After aging for 2 h with continuous stirring, the mixture was filtered, washed and dried at  $60^\circ\text{C}$  for 12 h. The XRD patterns of calcinated precipitate indicate that the powder is mainly composed of  $\text{MnFe}_2\text{O}_4$  (S1) and the vibrating sample magnetometer curve of synthesized  $\text{MnFe}_2\text{O}_4$  nanoparticles at room temperature shows that the hysteresis loop for the sample is completely reversible (S2). Also, the TEM image of  $\text{MnFe}_2\text{O}_4$  was shown that manganese ferrite nanoparticles have a mean diameter of about 25-30 nm (S3).

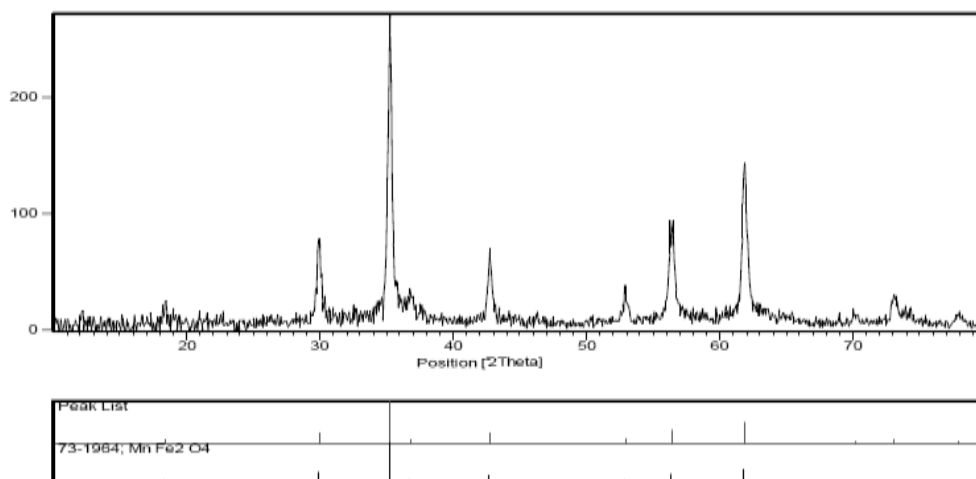

S1. XRD pattern of MnFe<sub>2</sub>O<sub>4</sub> nanoparticles

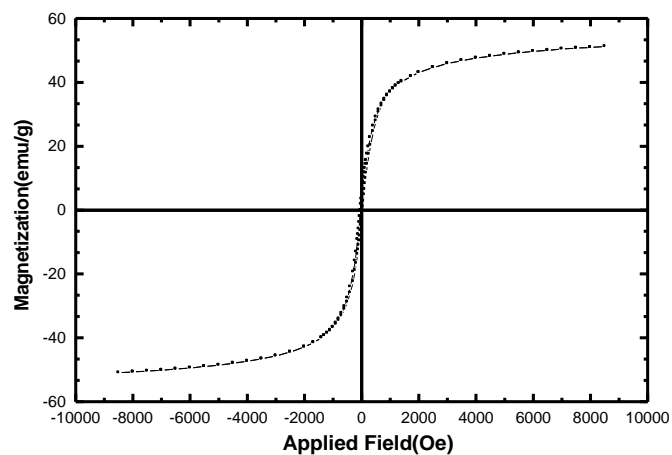

S2. Magnetization curve for the prepared nano MnFe<sub>2</sub>O<sub>4</sub>.

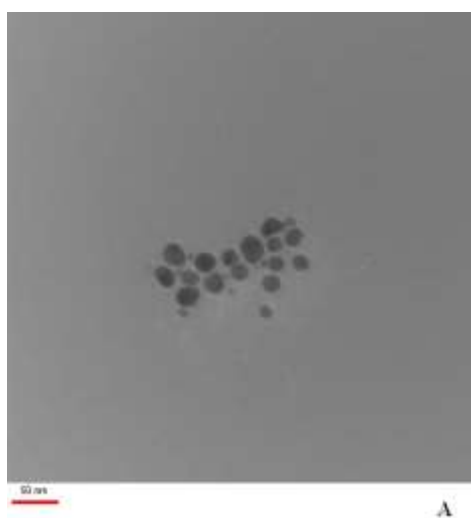

S3. The TEM image of MnFe<sub>2</sub>O<sub>4</sub> before the reaction

### Typical procedure for the preparation of spiro-furo-pyrido-pyrimidine-indoline derivatives 4(a-l).

Isatin (1 mmol), tetronic acid (1 mmol) and 2, 6-diaminopyrimidin-4(3H)-one or uraciles (1 mmol) were placed in a 10 ml round-bottomed flask in H<sub>2</sub>O (5 mL). Sequentially MnFe<sub>2</sub>O<sub>4</sub> (5 mol%) was added. The resulting mixture was stirred at 90 °C for 6h and monitored by TLC until conversion of the starting materials is satisfactory. After completion of the reaction, the reaction mixture was magnetically concentrated with the aid of a magnet to separate the catalyst. Catalyst was separated and washed several times with acetone followed by water, then dried under vacuum and reutilized four times for the same reaction. The reaction mixture was filtered and the precipitate washed with water and recrystallized by EtOH to afford the pure product and was identified by physical and spectroscopic data.

#### **2-Amino-3H-spiro[furo[3,4-g]pyrido[2,3-d]pyrimidine-5,3'-indoline]-2',4,6(8H,9H)-trione (4a):**

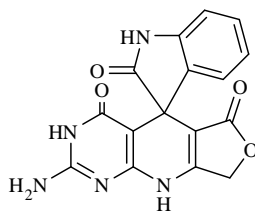

White powder (Yield: 82%, 0.277 g). mp: >350 °C. IR (KBr) ( $\nu_{\max}/\text{cm}^{-1}$ ): 3420, 3156, 1751, 1713, 1638; <sup>1</sup>H NMR (DMSO-*d*<sub>6</sub>, 400 MHz):  $\delta_{\text{ppm}}$ : 4.84 (2H, s, OCH<sub>2</sub>), 6.58-7.06 (6H, m, ArH and NH<sub>2</sub>), 10.06 (1H, s, NH), 10.19 (1H, s, NH), 10.47 (1H, s, NH); <sup>13</sup>C NMR (DMSO-*d*<sub>6</sub>, 100 MHz):  $\delta_{\text{ppm}}$ : 47.4, 65.7, 91.0, 98.7, 108.9, 121.5, 123.8, 127.9, 136.0, 142.7, 155.0, 155.4, 158.8, 161.2, 170.2, 179.0; Anal. Calcd for C<sub>16</sub>H<sub>11</sub>N<sub>5</sub>O<sub>4</sub>: C, 56.98; H, 3.29; N, 20.76; Found C, 56.97; H, 3.31; N, 20.71, MS: m/z 337.

#### **2-Amino-5'-bromo-3H-spiro[furo[3,4-g]pyrido[2,3-d]pyrimidine-5,3'-indoline]-2',4,6(8H,9H)-trione (4b):**

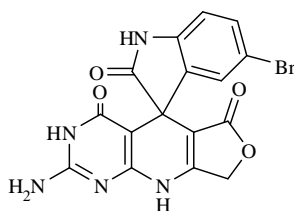

Cream powder (Yield: 80%, 0.332 g). mp: >350 °C. IR (KBr) ( $\nu_{\max}/\text{cm}^{-1}$ ): 3465, 3249, 1729, 1645, 1519;  $^1\text{H}$  NMR (DMSO- $d_6$ , 400 MHz):  $\delta_{\text{ppm}}$ : 4.86 (2H, s, OCH<sub>2</sub>), 6.65-7.24 (5H, m, ArH and NH<sub>2</sub>), 10.15 (1H, s, NH), 10.37 (1H, s, NH), 10.52 (1H, s, NH);  $^{13}\text{C}$  NMR (DMSO- $d_6$ , 100 MHz):  $\delta_{\text{ppm}}$ : 47.7, 65.9, 90.5, 97.9, 110.9, 113.2, 126.6, 130.7, 138.3, 142.2, 155.1, 155.6, 159.3, 161.2, 170.2, 178.7; Anal. Calcd for C<sub>16</sub>H<sub>10</sub>BrN<sub>5</sub>O<sub>4</sub>: C, 46.17; H, 2.42; N, 16.83; Found C, 46.21; H, 2.39; N, 16.88; MS: m/z, 416, 414.

**2-Amino-5'-nitro-5'-nitro-3H-spiro[furo[3,4-g]pyrido[2,3-d]pyrimidine-5,3'-indoline]-2',4,6(8H,9H)-trione (4c):**

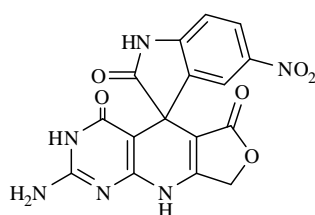

Yellow powder (Yield: 77%, 0.294 g). mp: >350 °C. IR (KBr) ( $\nu_{\max}/\text{cm}^{-1}$ ): 3449, 3173, 1727, 1640, 1594;  $^1\text{H}$  NMR (DMSO- $d_6$ , 400 MHz):  $\delta_{\text{ppm}}$ : 4.91 (2H, s, OCH<sub>2</sub>), 6.91-8.10 (5H, m, ArH and NH<sub>2</sub>), 10.29 (1H, s, NH), 10.59 (1H, s, NH), 11.01 (1H, s, NH);  $^{13}\text{C}$  NMR (DMSO- $d_6$ , 100 MHz):  $\delta_{\text{ppm}}$ : 47.5, 66.1, 90.0, 97.3, 109.0, 119.3, 125.8, 136.8, 142.4, 149.5, 155.2, 155.7, 159.7, 161.3, 170.2, 179.7; Anal. Calcd for C<sub>16</sub>H<sub>10</sub>N<sub>6</sub>O<sub>6</sub>: C, 50.27; H, 2.64; N, 21.98. Found C, 50.24; H, 2.60; N, 21.93; MS: m/z 382.

**2-Amino-5'-methyl-3H-spiro[furo[3,4-g]pyrido[2,3-d]pyrimidine-5,3'-indoline]-2',4,6(8H,9H)-trione (4d):**

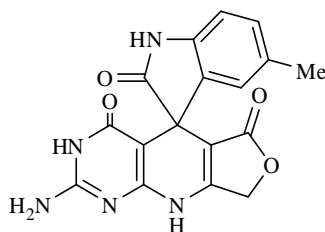

Cream powder (Yield: 79%, 0.277 g). mp: >350 °C. IR (KBr) ( $\nu_{\max}/\text{cm}^{-1}$ ): 3392, 3271, 1732, 1641, 1518  $^1\text{H}$  NMR (DMSO- $d_6$ , 400 MHz):  $\delta_{\text{ppm}}$ : 2.14 (3H, s, CH<sub>3</sub>), 4.84 (2H, s, OCH<sub>2</sub>), 6.56-6.84 (5H, m, ArH and NH<sub>2</sub>), 10.06 (1H, s, NH), 10.09 (1H, s, NH), 10.47 (1H, s, NH);  $^{13}\text{C}$  NMR (DMSO- $d_6$ , 100 MHz):  $\delta_{\text{ppm}}$ : 21.0, 47.4, 65.7, 91.1, 98.8, 108.6, 124.4, 128.2, 130.1, 136.1, 140.3, 155.0, 155.4, 158.7, 161.1, 170.2,

178.9; Anal. Calcd for  $C_{17}H_{13}N_5O_4$ : C, 58.12; H, 3.73; N, 19.93. Found C, 58.09; H, 3.78; N, 19.88; MS: m/z 351.

**2-Amino-1'-methyl-3H-spiro[furo[3,4-g]pyrido[2,3-d]pyrimidine-5,3'-indoline]-2',4,6(8H,9H)-trione (4e):**

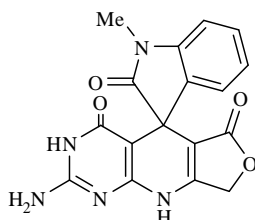

Cream powder (Yield: 76%, 0.267 g). mp:  $>350$  °C. IR (KBr) ( $\nu_{\max}/\text{cm}^{-1}$ ): 3490, 3376, 3211, 1680, 1647;  $^1\text{H}$  NMR (DMSO- $d_6$ , 400 MHz):  $\delta_{\text{ppm}}$ : 3.08 (3H, s,  $\text{CH}_3$ ), 4.90 (2H, s,  $\text{OCH}_2$ ), 6.65-7.20- (6H, m, ArH and  $\text{NH}_2$ ), 10.11 (1H, s, NH), 10.35 (1H, s, NH);  $^{13}\text{C}$  NMR (DMSO- $d_6$ , 100 MHz):  $\delta_{\text{ppm}}$ : 26.7, 46.9, 65.8, 90.8, 98.4, 107.8, 122.4, 123.5, 128.3, 135.1, 144.1, 155.0, 155.4, 159.0, 161.1, 170.2, 177.6; Anal. Calcd for  $C_{17}H_{13}N_5O_4$ : C, 58.07; H, 3.73; N, 19.93;. Found C, 58.10; H, 3.76; N, 19.90; MS: m/z 351.

**1H-Spiro[furo[3,4-g]pyrido[2,3-d]pyrimidine-5,3'-indoline]-2,2',4,6(3H,8H,9H)-tetraone (4f):**

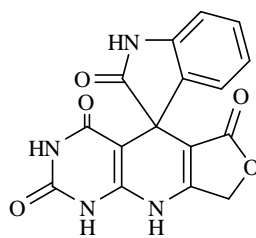

White powder (Yield: 83%, 0.280 g). mp:  $>350$  °C. IR (KBr) ( $\nu_{\max}/\text{cm}^{-1}$ ): 3175, 3103, 1693, 1650, 1538;  $^1\text{H}$  NMR (DMSO- $d_6$ , 400 MHz):  $\delta_{\text{ppm}}$ : 4.90 (2H, s,  $\text{OCH}_2$ ), 6.69-7.08 (4H, m, ArH), 10.02 (1H, s, NH), 10.33 (1H, s, NH), 10.83 (1H, s, NH), 11.59 (1H, s, NH);  $^{13}\text{C}$  NMR (DMSO- $d_6$ , 100 MHz):  $\delta_{\text{ppm}}$ : 46.8, 66.4, 89.1, 101.0, 109.1, 121.6, 124.0, 128.4, 135.1, 142.8, 146.0, 150.4, 157.3, 162.3, 169.6, 178.3; Anal. Calcd for  $C_{16}H_{10}N_4O_5$ : C, 56.81; H, 2.98; N, 16.56; Found C, 56.84; H, 2.94; N, 16.52; MS: m/z 338.

**1'-Methyl-1H-spiro[furo[3,4-g]pyrido[2,3-d]pyrimidine-5,3'-indoline]-2,2',4,6  
(3H,8H,9H)-tetraone (4g):**

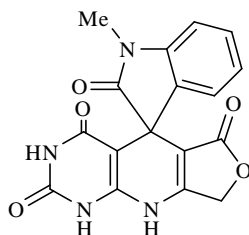

White powder (Yield: 78%, 0.274 g). mp: >350 °C. IR (KBr) ( $\nu_{\max}/\text{cm}^{-1}$ ): 3495, 3350, 3211, 1755, 1683;  $^1\text{H}$  NMR (DMSO- $d_6$ , 400 MHz):  $\delta_{\text{ppm}}$ : 3.09 (3H, s, CH<sub>3</sub>), 4.90 (2H, s, OCH<sub>2</sub>), 6.89-7.21 (4H, m, ArH), 10.05 (1H, s, NH), 10.82 (1H, s, NH), 11.59 (1H, s, NH);  $^{13}\text{C}$  NMR (DMSO- $d_6$ , 100 MHz):  $\delta_{\text{ppm}}$ : 26.7, 46.3, 66.5, 89.0, 100.8, 108.0, 122.4, 123.7, 128.6, 134.2, 144.3, 146.0, 150.4, 157.5, 162.2, 169.6, 177.0; Anal. Calcd for C<sub>17</sub>H<sub>12</sub>N<sub>4</sub>O<sub>5</sub>: C, 57.96; H, 3.43; N, 15.90;. Found C, 57.92; H, 3.41; N, 15.94; MS: m/z 352.

Due to very low solubility of the products **4h**, we can not report the  $^{13}\text{C}$  NMR data for this product.

**5'-Methyl-1H-spiro[furo[3,4-g]pyrido[2,3-d]pyrimidine-5,3'-indoline]-2,2',4,6  
(3H,8H,9H)-tetraone (4h):**

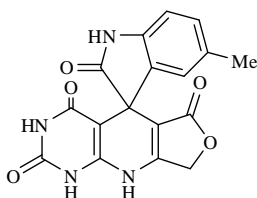

Cream powder (Yield: 75%, 0.264 g). mp: >350 °C. IR (KBr) ( $\nu_{\max}/\text{cm}^{-1}$ ): 3483, 3176, 1759, 1694;  $^1\text{H}$  NMR (DMSO- $d_6$ , 400 MHz):  $\delta_{\text{ppm}}$ : 2.15 (3H, s, CH<sub>3</sub>), 4.89 (2H, s, OCH<sub>2</sub>), 6.59-6.88 (3H, m, ArH), 9.97 (1H, s, NH), 10.22 (1H, s, NH), 10.81 (1H, s, NH), 11.53 (1H, s, NH); Anal. Calcd for C<sub>17</sub>H<sub>12</sub>N<sub>4</sub>O<sub>5</sub>: C, 57.96; H, 3.43; N, 15.90;. Found C, 57.98; H, 3.38; N, 15.86; MS: m/z 352.

**5'-Bromo-1,3-dimethyl-1H-spiro[furo[3,4-g]pyrido[2,3-d]pyrimidine-5,3'-indoline]-2,2',4,6(3H,8H,9H)-tetraone (4i):**

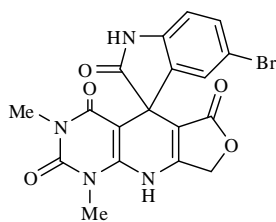

Cream powder (Yield: 76%, 0.338 g). mp: >350 °C. IR (KBr) ( $\nu_{\max}$ /  $\text{cm}^{-1}$ ): 3443, 3162, 1765, 1645;  $^1\text{H}$  NMR (DMSO- $d_6$ , 400 MHz):  $\delta_{\text{ppm}}$ : 3.12 (3H, s, CH<sub>3</sub>), 3.38 (3H, s, CH<sub>3</sub>), 3.44 (3H, s, CH<sub>3</sub>), 4.97 (2H, s, OCH<sub>2</sub>), 6.91-7.39 (3H, m, ArH), 10.45 (1H, s, NH), 11.66 (1H, s, NH);  $^{13}\text{C}$  NMR (DMSO- $d_6$ , 100 MHz):  $\delta_{\text{ppm}}$ : 27.59, 31.8, 49.8, 65.7, 92.1, 95.2, 115.4, 119.1, 123.8, 130.4, 132.0, 136.6, 151.6, 153.3, 157.4, 159.4, 170.9, 180.0; Anal. Calcd for C<sub>18</sub>H<sub>13</sub>BrN<sub>4</sub>O<sub>5</sub>: C, 48.56; H, 2.94; N, 12.58. Found C, 48.60; H, 2.90; N, 12.55; MS: m/z 446, .444.

Due to very low solubility of the products **4j**, we can not report the  $^{13}\text{C}$  NMR data for this product.

**1,1',3-Trimethyl-1H-spiro[furo[3,4-g]pyrido[2,3-d]pyrimidine-5,3'-indoline] [2,2',4,6(3H,8H,9H)-tetraone (4j):**

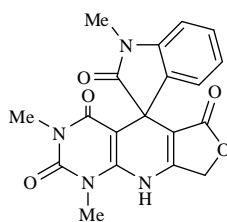

White powder (Yield: 72%, 0.273 g). mp: >350 °C. IR (KBr) ( $\nu_{\max}$ /  $\text{cm}^{-1}$ ): 3447, 3252, 1680, 1642;  $^1\text{H}$  NMR (DMSO- $d_6$ , 400 MHz):  $\delta_{\text{ppm}}$ : 2.99 (3H, s, CH<sub>3</sub>), 3.12 (3H, s, CH<sub>3</sub>), 3.44 (3H, s, CH<sub>3</sub>), 4.97 (2H, s, CH<sub>2</sub>), 6.91-7.20 (4H, m, ArH), 10.58 (1H, s, NH); Anal. Calcd for C<sub>19</sub>H<sub>16</sub>N<sub>4</sub>O<sub>5</sub>: C, 60.00; H, 4.24; N, 14.73. Found C, 60.04; H, 4.21; N, 14.68; MS: m/z 380.

**1,3-Dimethyl-5'-nitro-1H-spiro[furo[3,4-g]pyrido[2,3-d]pyrimidine-5,3'-indoline] [2,2',4,6(3H,8H,9H)-tetraone (4k):**

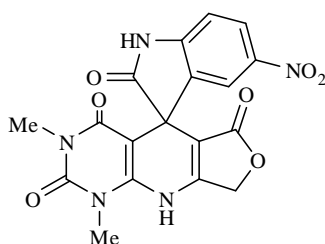



Yellow powder (Yield: 74%, 0.304 g). mp: >350 °C. IR (KBr) ( $\nu_{\max}$ /  $\text{cm}^{-1}$ ): 3525, 3114, 1739, 1651.  $^1\text{H}$  NMR (DMSO- $d_6$ , 400 MHz):  $\delta_{\text{ppm}}$ : 3.01 (3H, s,  $\text{CH}_3$ ), 3.39 (3H, s,  $\text{CH}_3$ ), 5.05 (2H, s,  $\text{OCH}_2$ ), 7.14-8.10 (3H, m, ArH), 11.02 (1H, s, NH), 11.86 (1H, s, NH);  $^{13}\text{C}$  NMR (DMSO- $d_6$ , 100 MHz):  $\delta_{\text{ppm}}$ : 27.6, 31.9, 49.8, 66.0, 94.1, 95.7, 117.7, 122.2, 124.3, 125.3, 142.9, 143.3, 151.6, 153.4, 157.5, 159.3, 170.6, 179.7; Anal. Calcd for  $\text{C}_{18}\text{H}_{13}\text{N}_5\text{O}_7$ : C, 52.56; H, 3.19; N, 17.03. Found C, 52.53; H, 3.24; N, 17.07; MS: m/z 411.

Due to very low solubility of the products **4l**, we can not report the  $^{13}\text{C}$  NMR data for this product.

**1,3-Dimethyl-1H-spiro[furo[3,4-g]pyrido[2,3-d]pyrimidine-5,3'-indoline]-2,2',4,6 (3H,8H,9H)-tetraone (4l):**

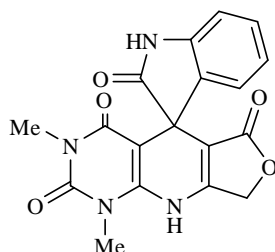

White powder (Yield: 75%, 0.274 g). mp: >350 °C. IR (KBr) ( $\nu_{\max}$ /  $\text{cm}^{-1}$ ): 3543, 3234, 1725, 1648;  $^1\text{H}$  NMR (DMSO- $d_6$ , 400 MHz):  $\delta_{\text{ppm}}$ : 3.04 (3H, s,  $\text{CH}_3$ ), 3.33 (3H, s,  $\text{CH}_3$ ), 4.95 (2H, s,  $\text{CH}_2$ ), 6.90-7.23 (4H, m, ArH), 10.33 (1H, s, NH), 11.65 (1H, s, NH); Anal. Calcd for  $\text{C}_{18}\text{H}_{14}\text{N}_4\text{O}_5$ : C, 59.02; H, 3.85; N, 15.29. Found C, 59.07; H, 3.80; N, 15.34; MS: m/z 366.

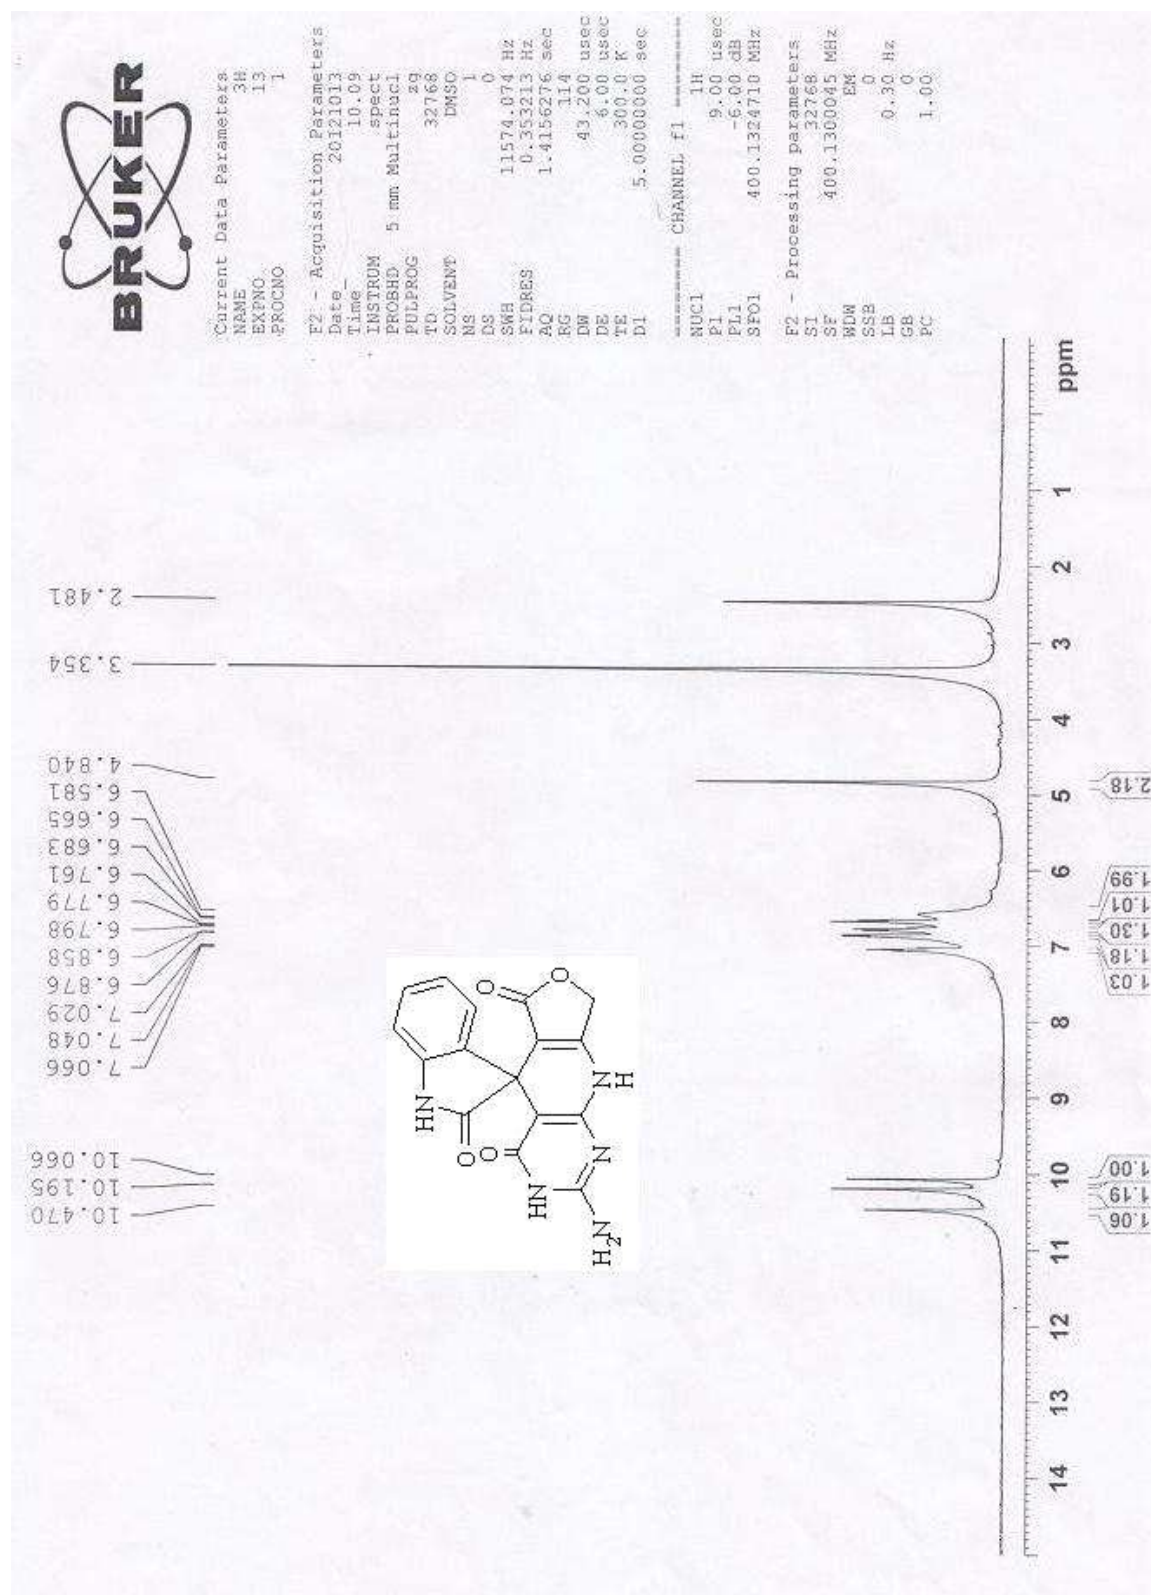

***<sup>1</sup>H NMR spectrum of 2-amino-3H-spiro[furo[3,4-g]pyrido[2,3-d]pyrimidine-5,3'-indoline]-2',4,6(8H,9H)-trione (4a):***

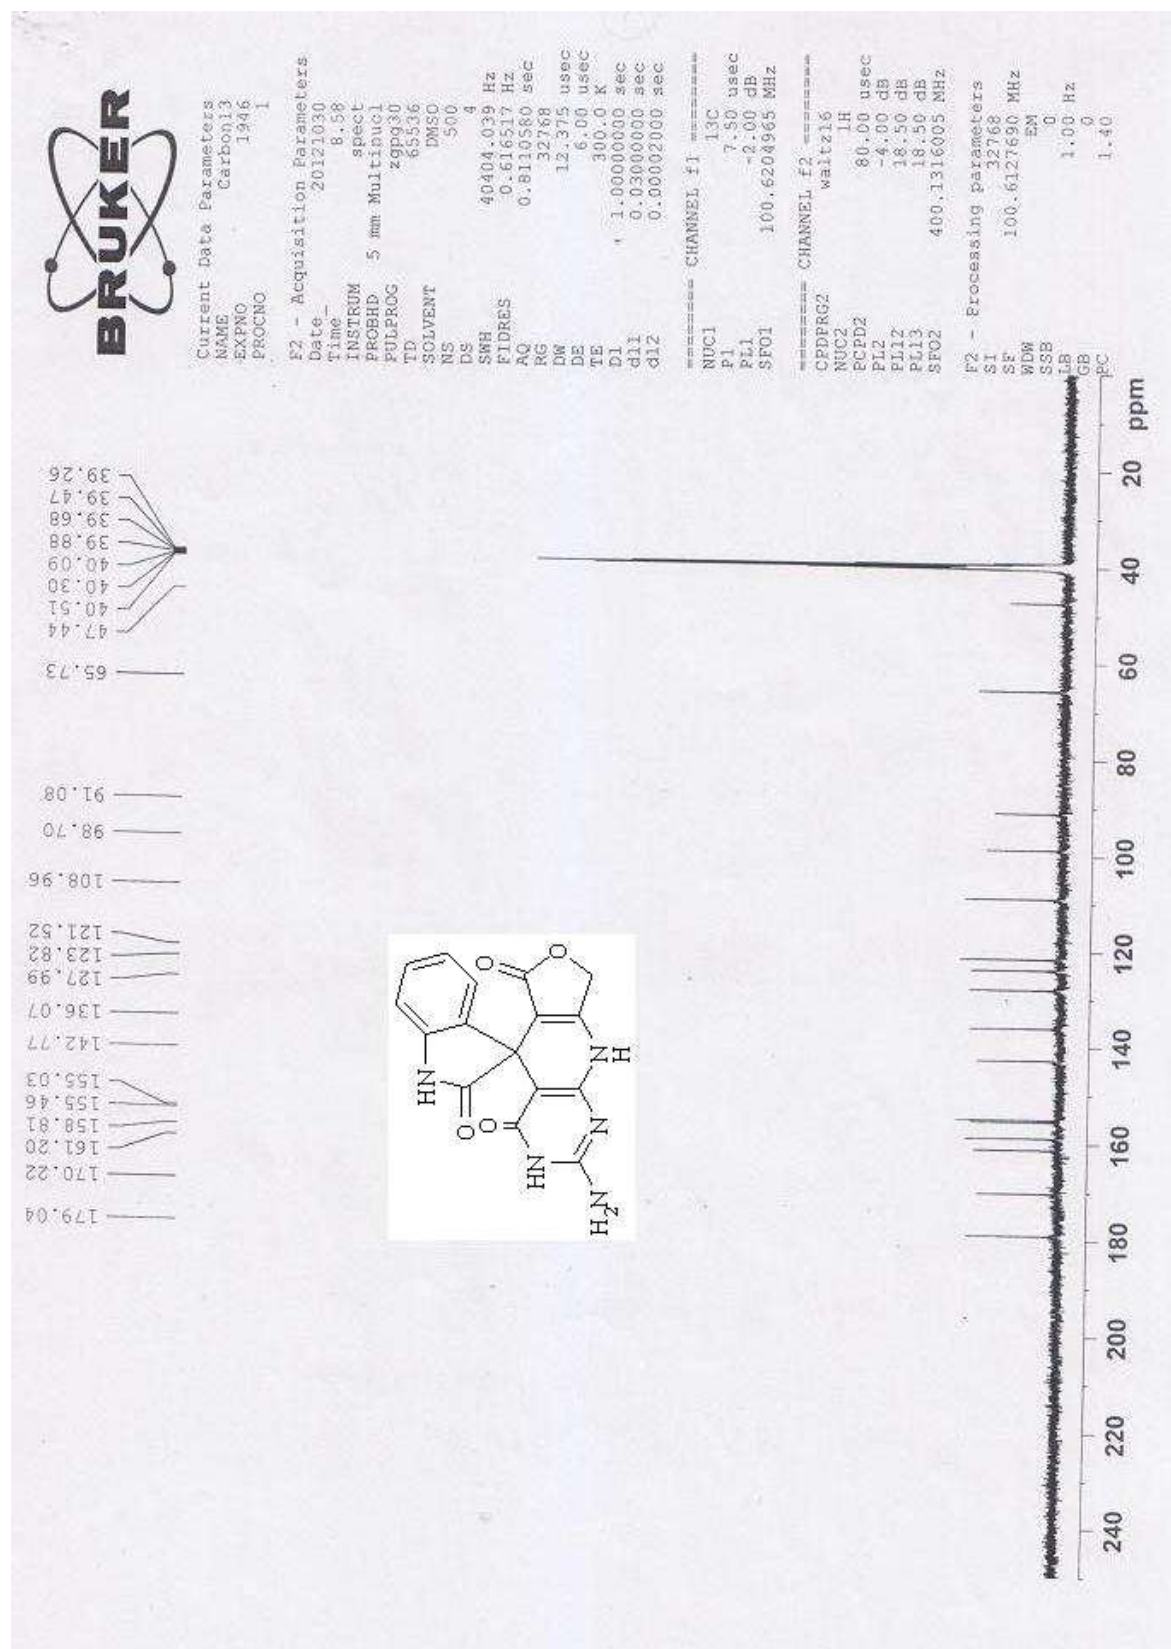

***<sup>13</sup>C NMR spectrum of 2-amino-3H-spiro[furo[3,4-g]pyrido[2,3-d]pyrimidine-5,3'-indoline]-2',4,6(8H,9H)-trione (4a):***

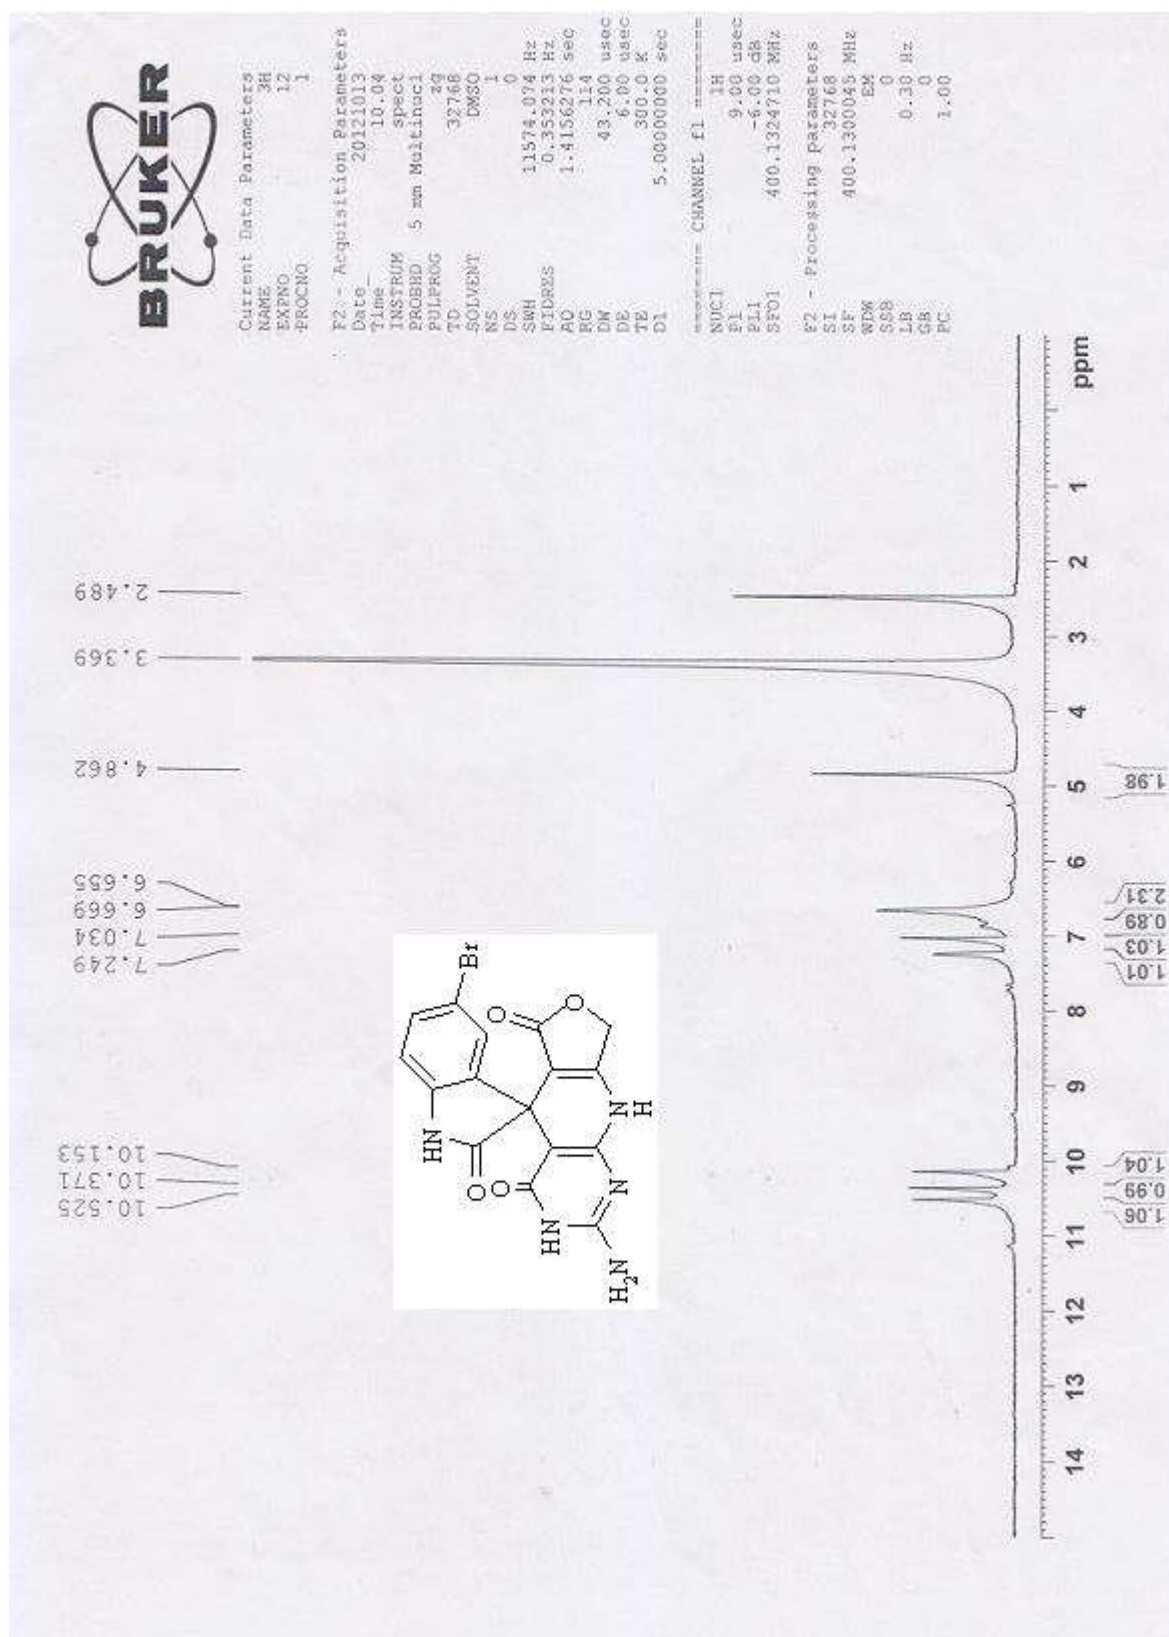

*<sup>1</sup>H NMR spectrum of 2-amino-5'-bromo-3H-spiro[furo[3,4-g]pyrido[2,3-d]pyrimidine-5,3'-indoline]-2',4,6,8H,9H)-trione (4b):*



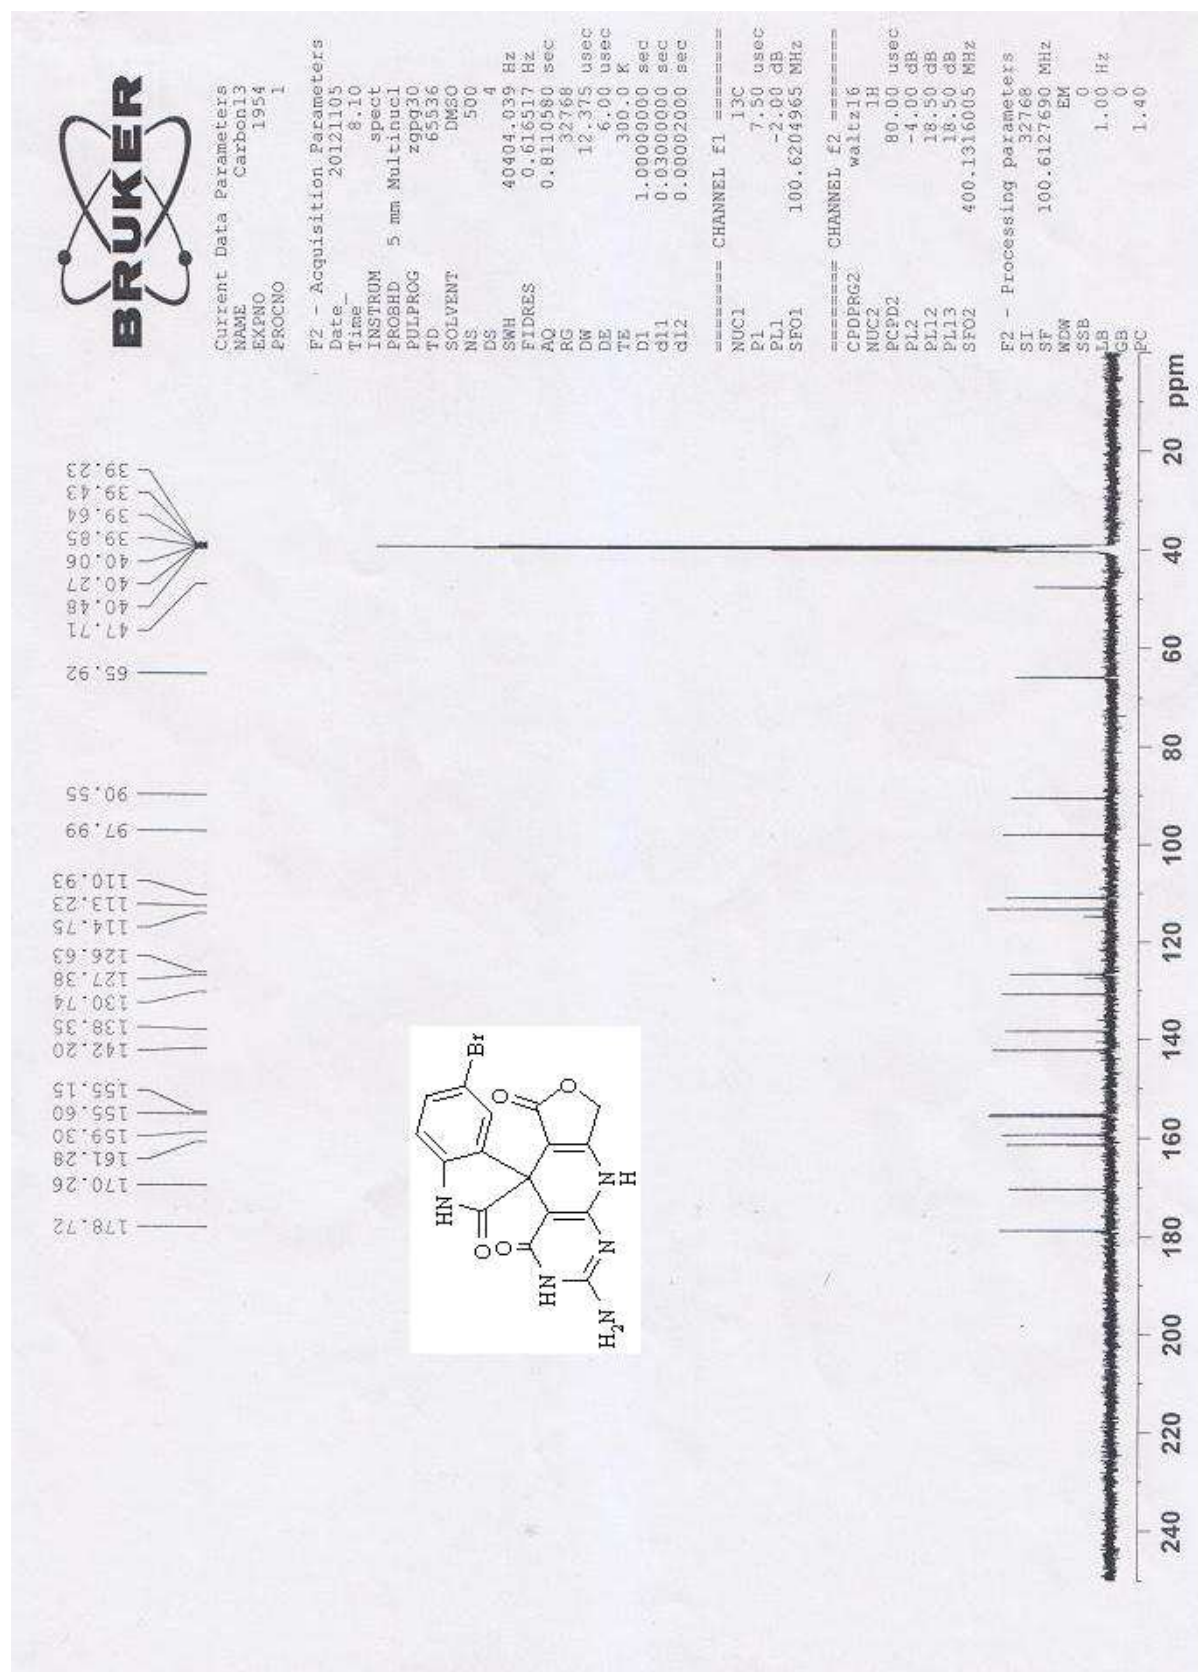

*<sup>13</sup>C NMR spectrum of 2-amino-5'-bromo-3H-spiro[furo[3,4-g]pyrido[2,3-d]pyrimidine-5,3'-indoline]-2',4,6,8H,9H)-trione (4b):*

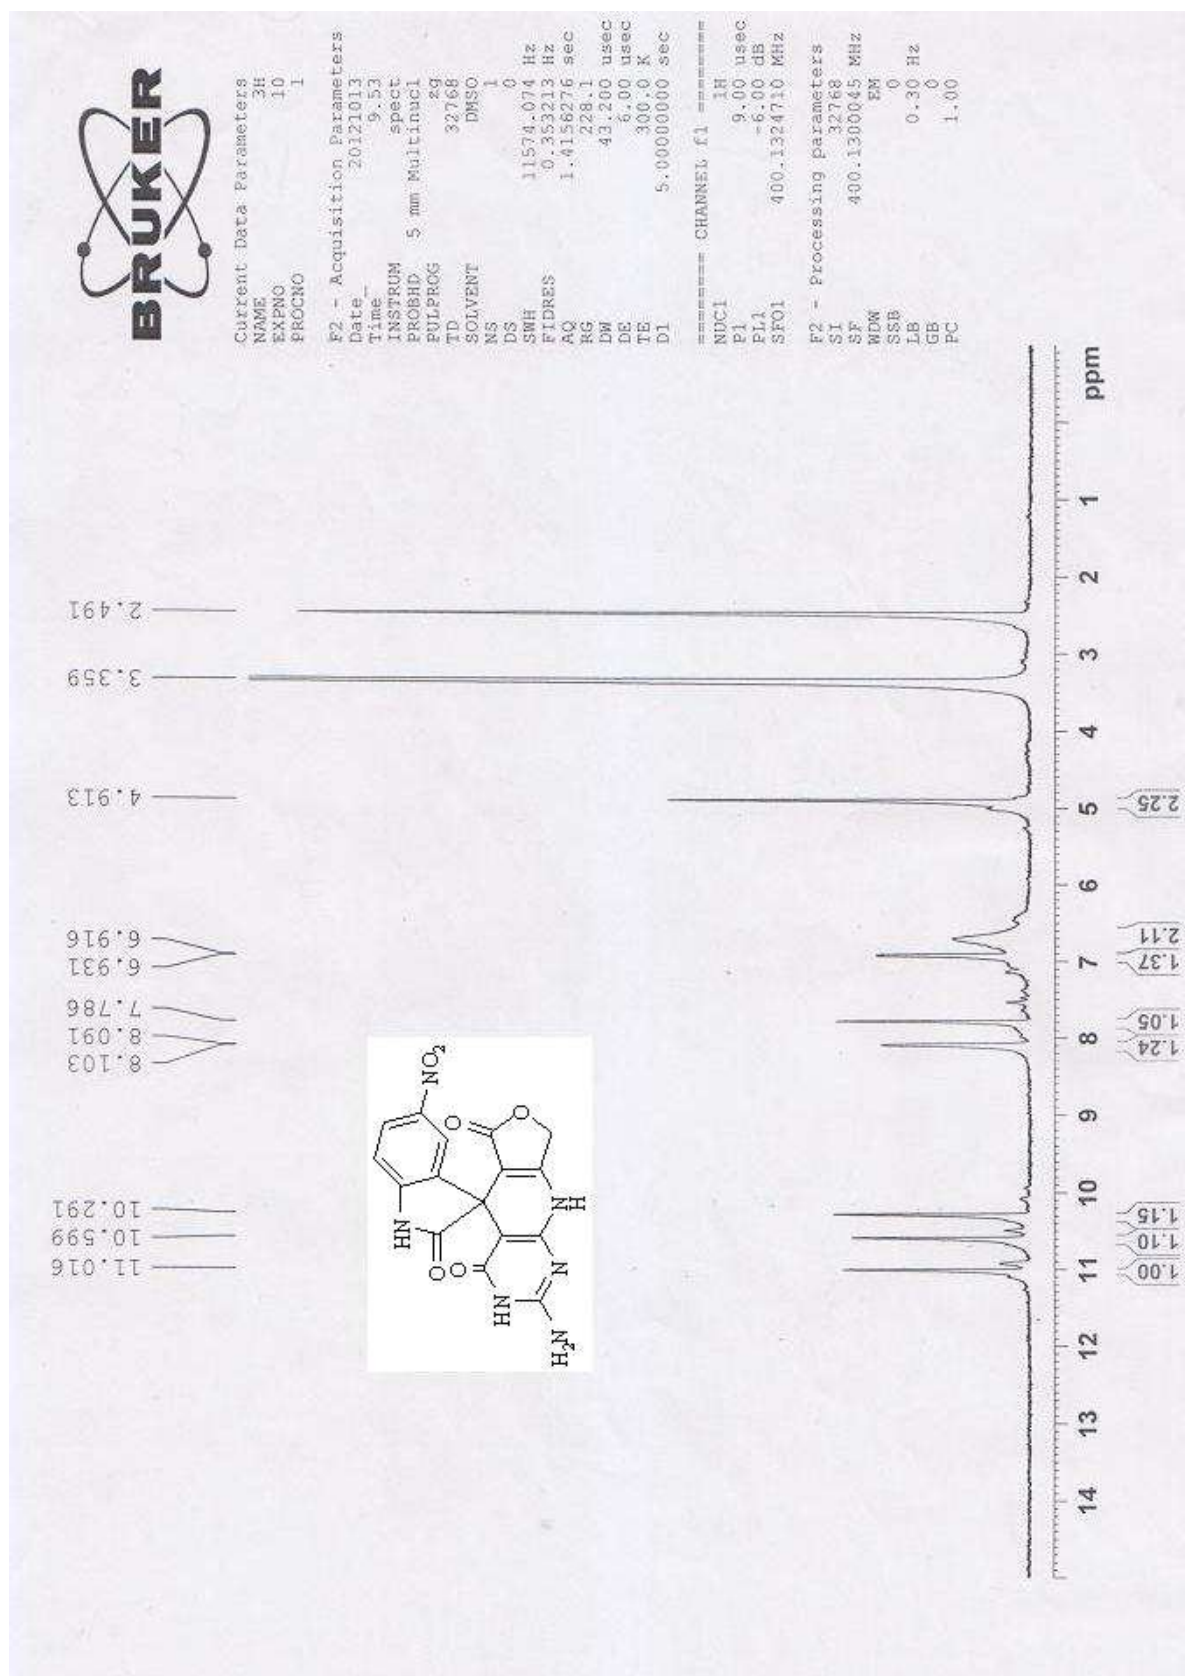

*<sup>1</sup>H NMR spectrum of 2-amino-5'-nitro-5-nitro-3H-spiro[furo[3,4-g]pyrido[2,3-d]pyrimidine-5,3'-indoline]-2',4,6(8H,9H)-trione (4c):*

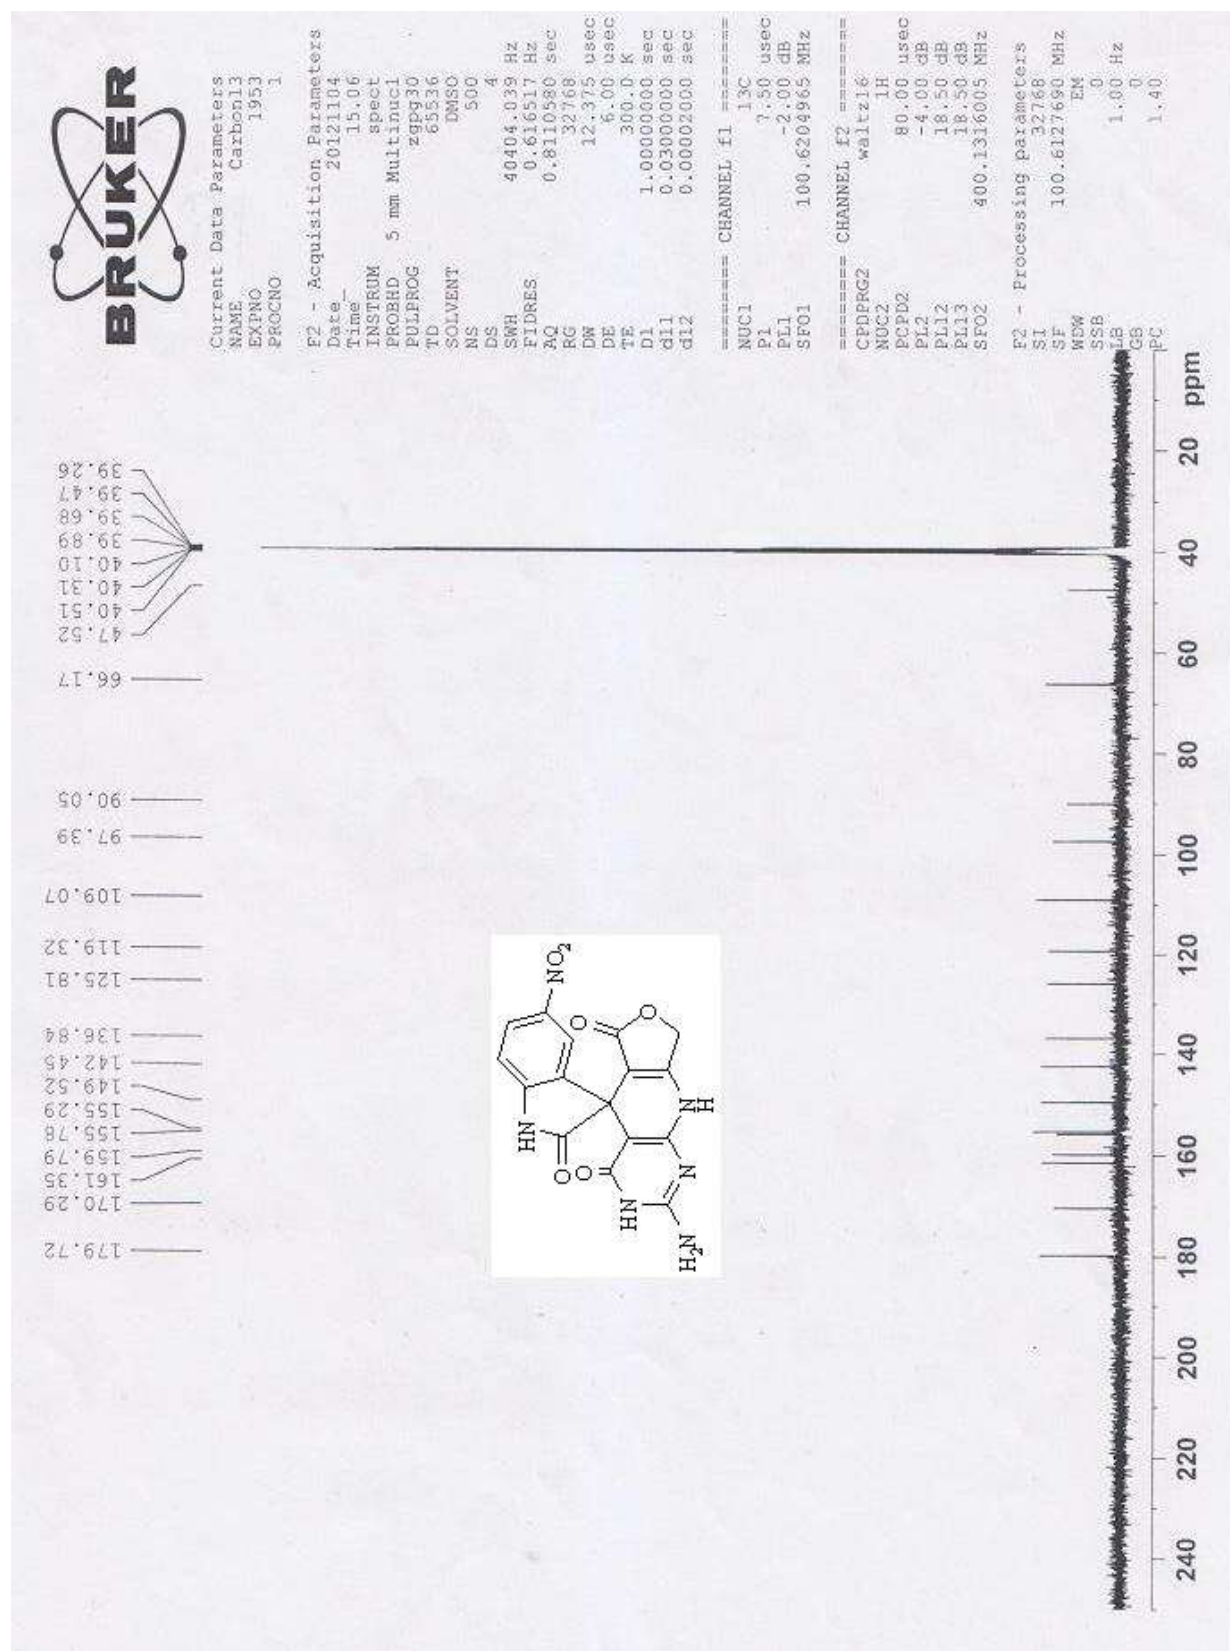

*<sup>13</sup>C NMR spectrum of 2-amino-5'-nitro-5'-nitro-3H-spiro[furo[3,4-g]pyrido[2,3-d]pyrimidine-5,3'-indoline]-2',4,6(8H,9H)-trione (4c):*



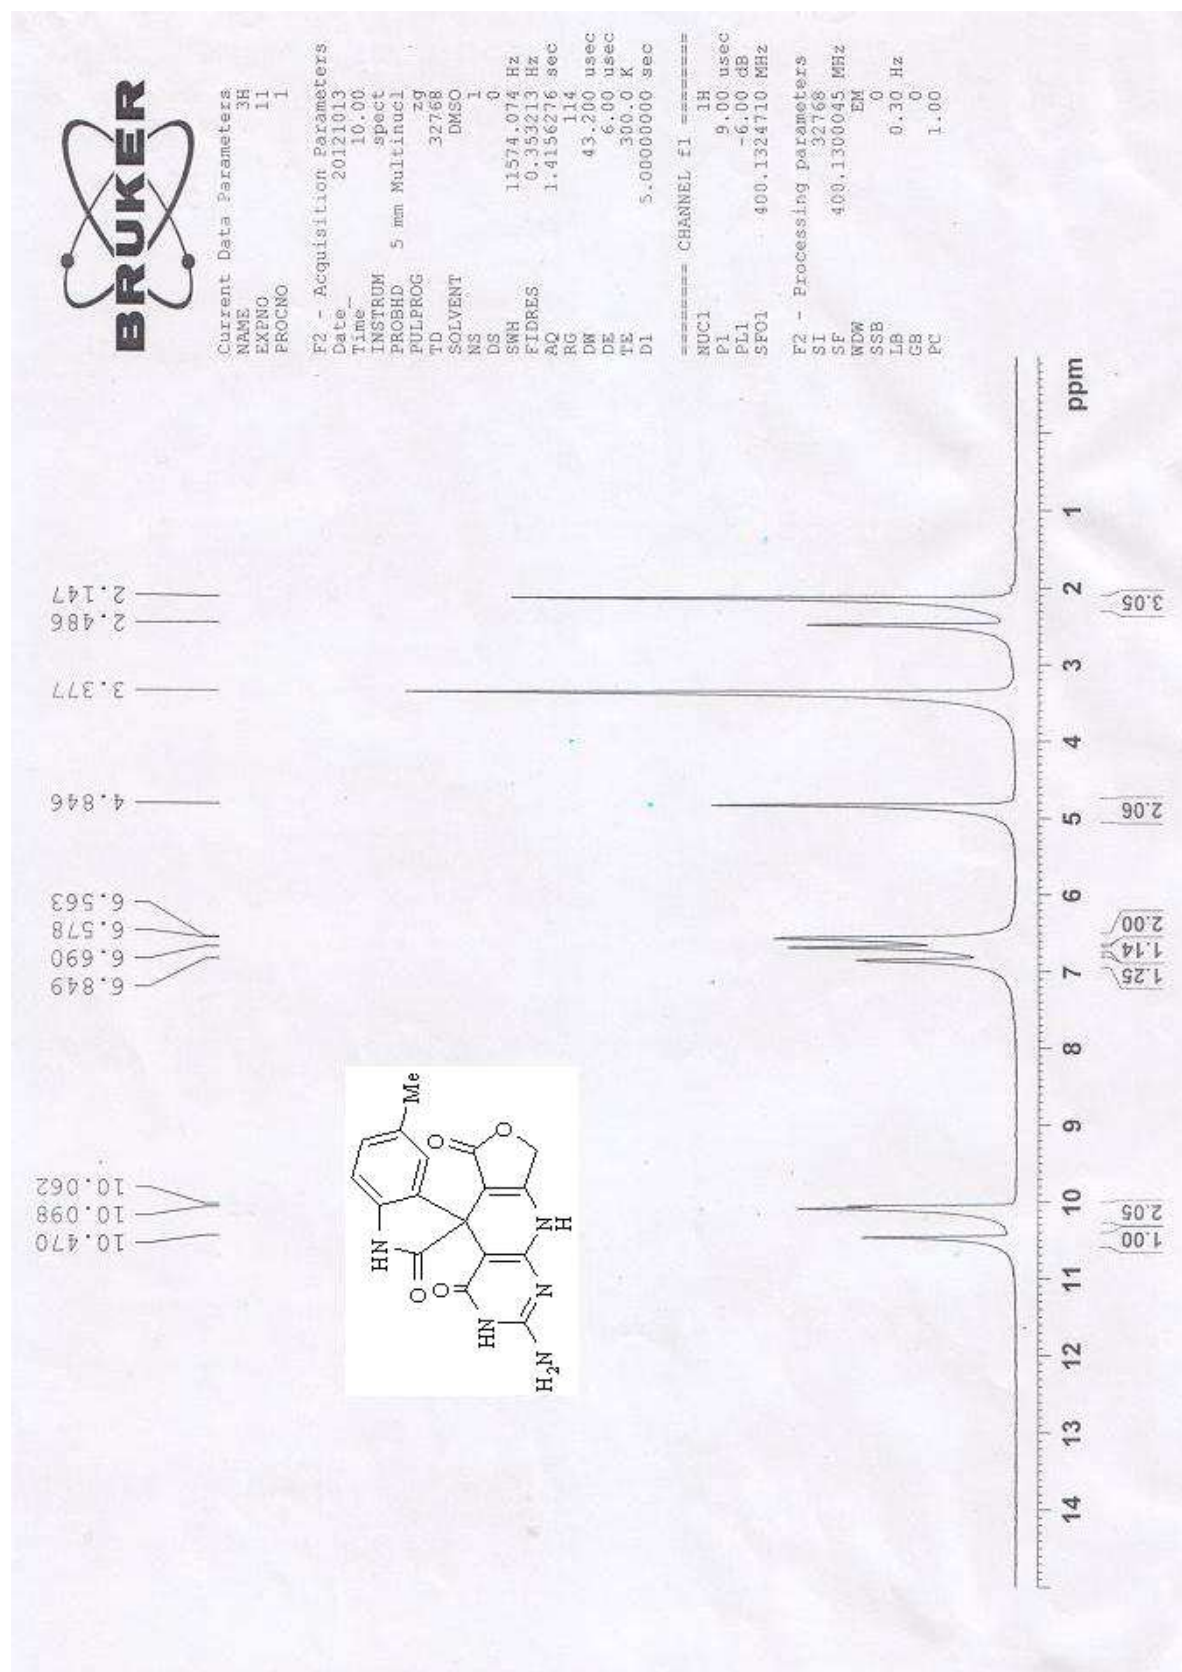

*<sup>1</sup>H NMR spectrum of 2-amino-5'-methyl-3H-spiro[furo[3,4-g]pyrido[2,3-d]pyrimidine-5,3'-indoline]-2',4,6(8H,9H)-trione (4d):*



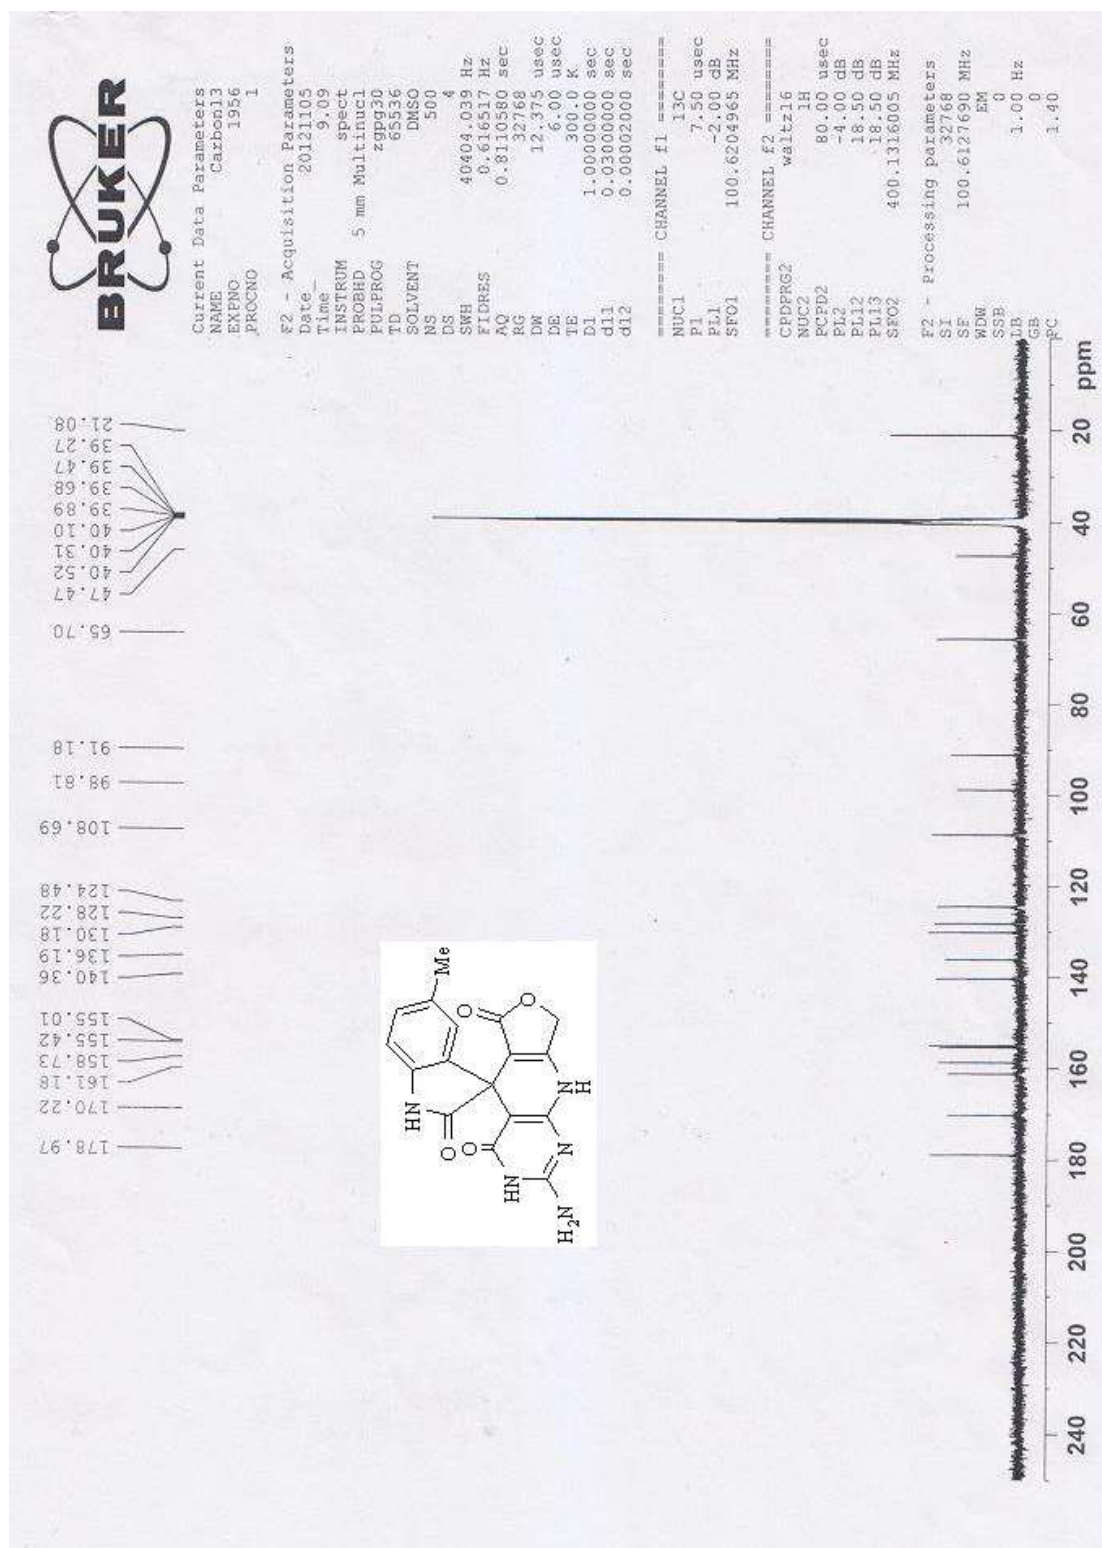

*<sup>13</sup>C NMR spectrum of 2-amino-5'-methyl-3H-spiro[furo[3,4-g]pyrido[2,3-d]pyrimidine-5,3'-indoline]-2',4,6(8H,9H)-trione (4d):*

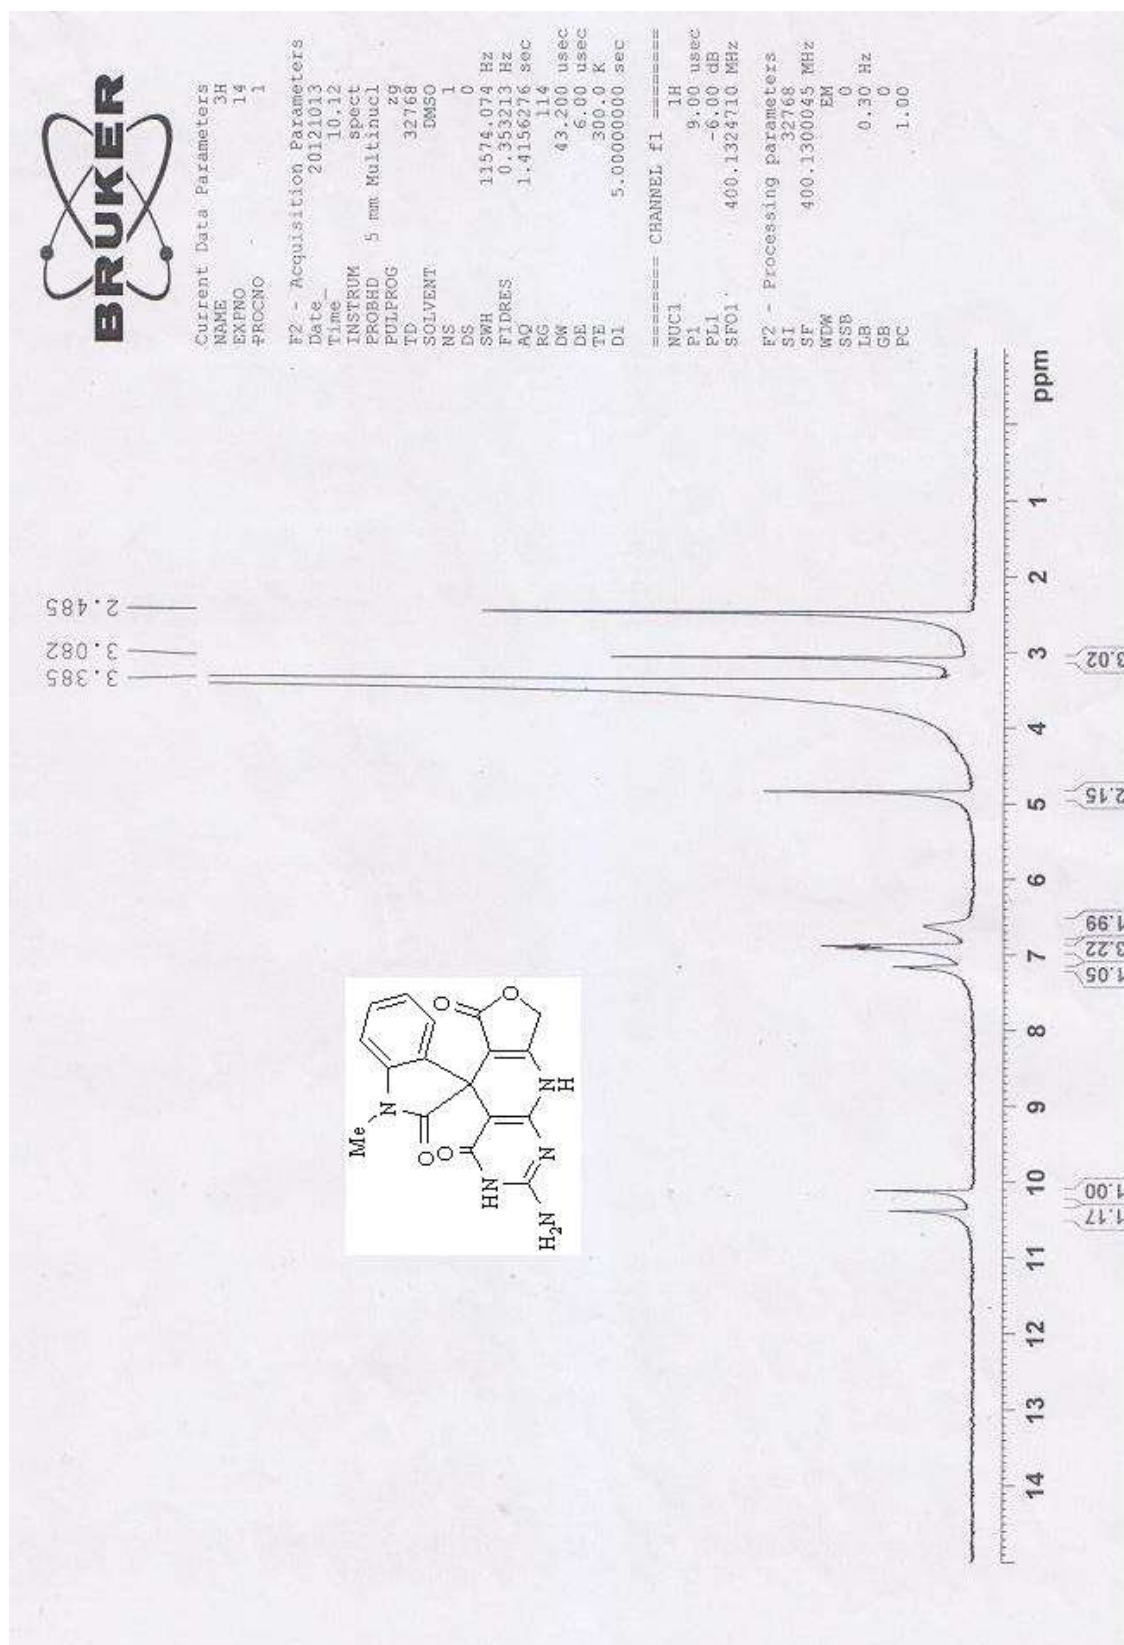

***<sup>1</sup>H NMR spectrum of 2-amino-1'-methyl-3H-spiro[furo[3,4-g]pyrido[2,3-d]pyrimidine-5,3'-indoline]-2',4,6(8H,9H)-trione (4e):***

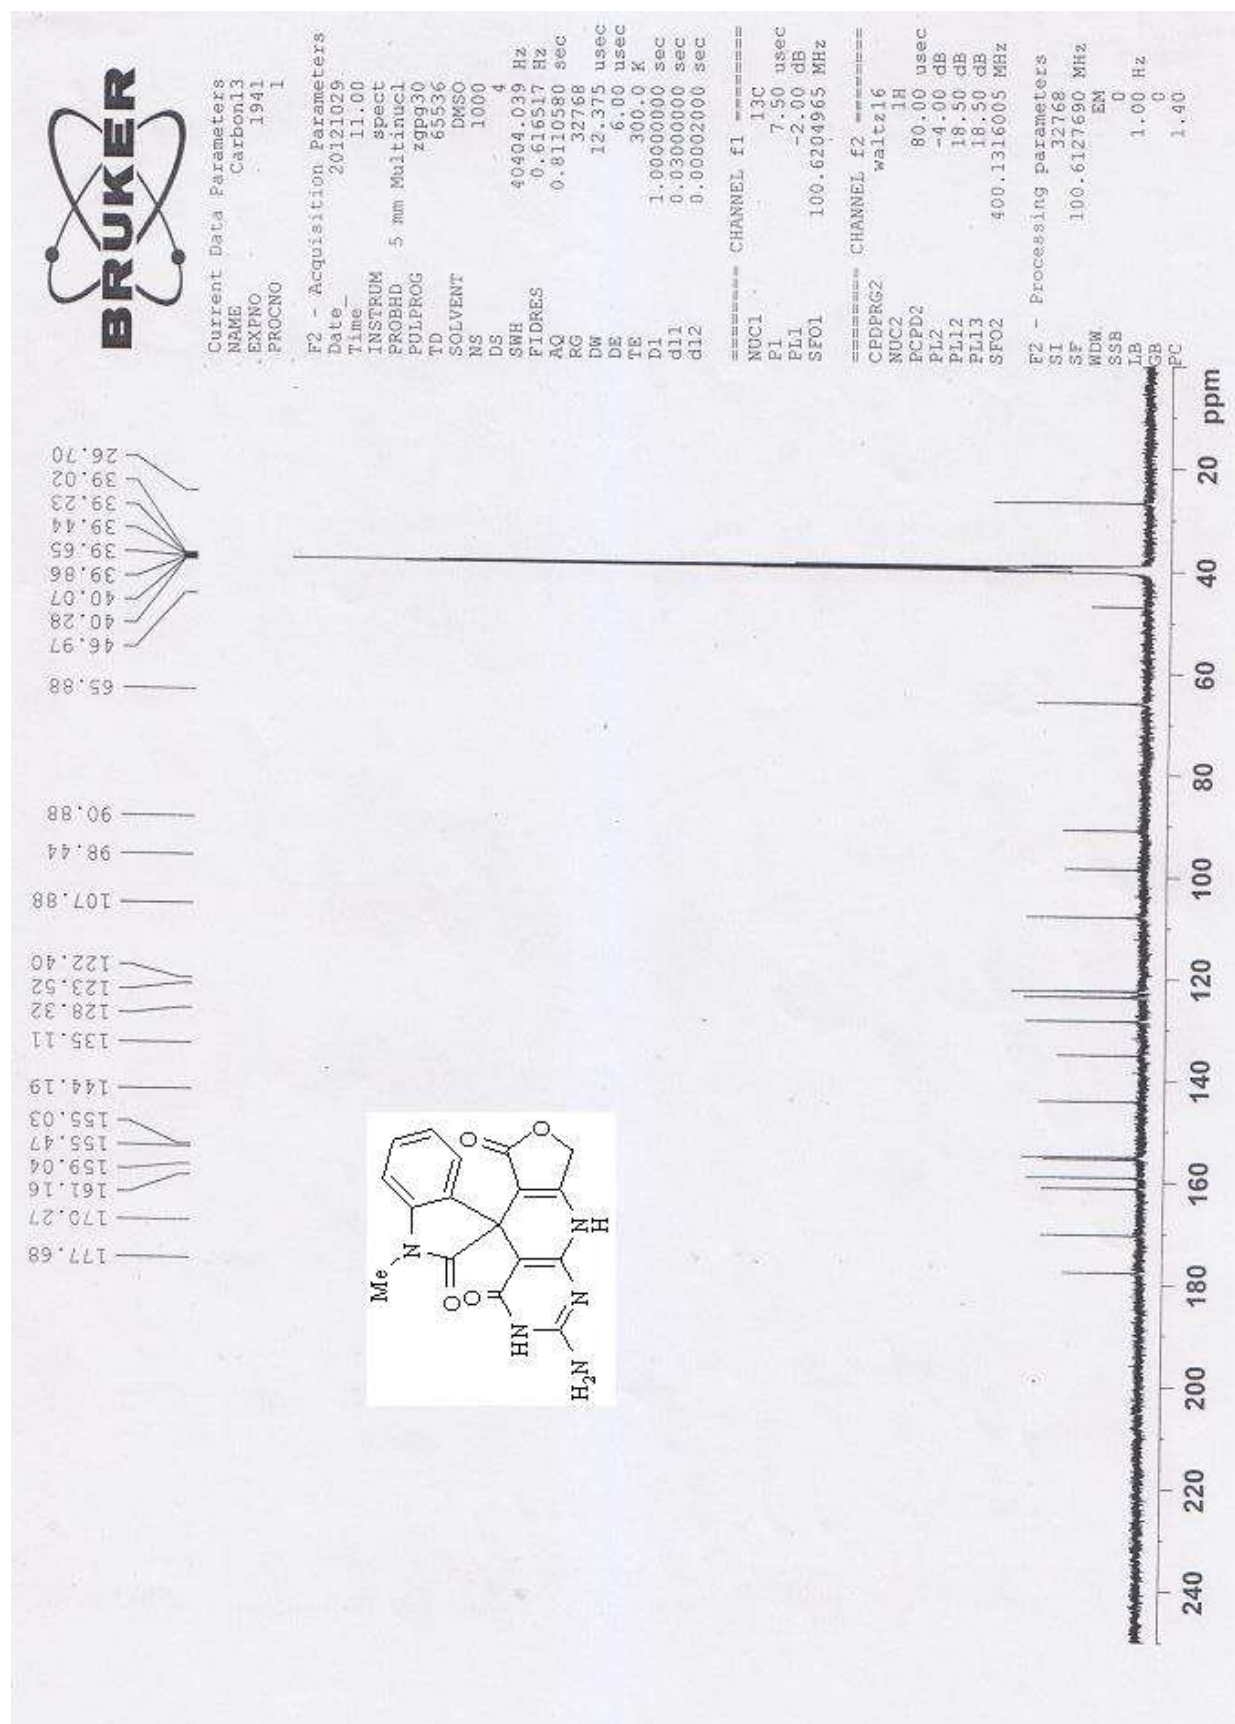

<sup>13</sup>C NMR spectrum of 2-amino-1'-methyl-3H-spiro[furo[3,4-g]pyrido[2,3-d]pyrimidine-5,3'-indoline]-2',4,6(8H,9H)-trione (4e):



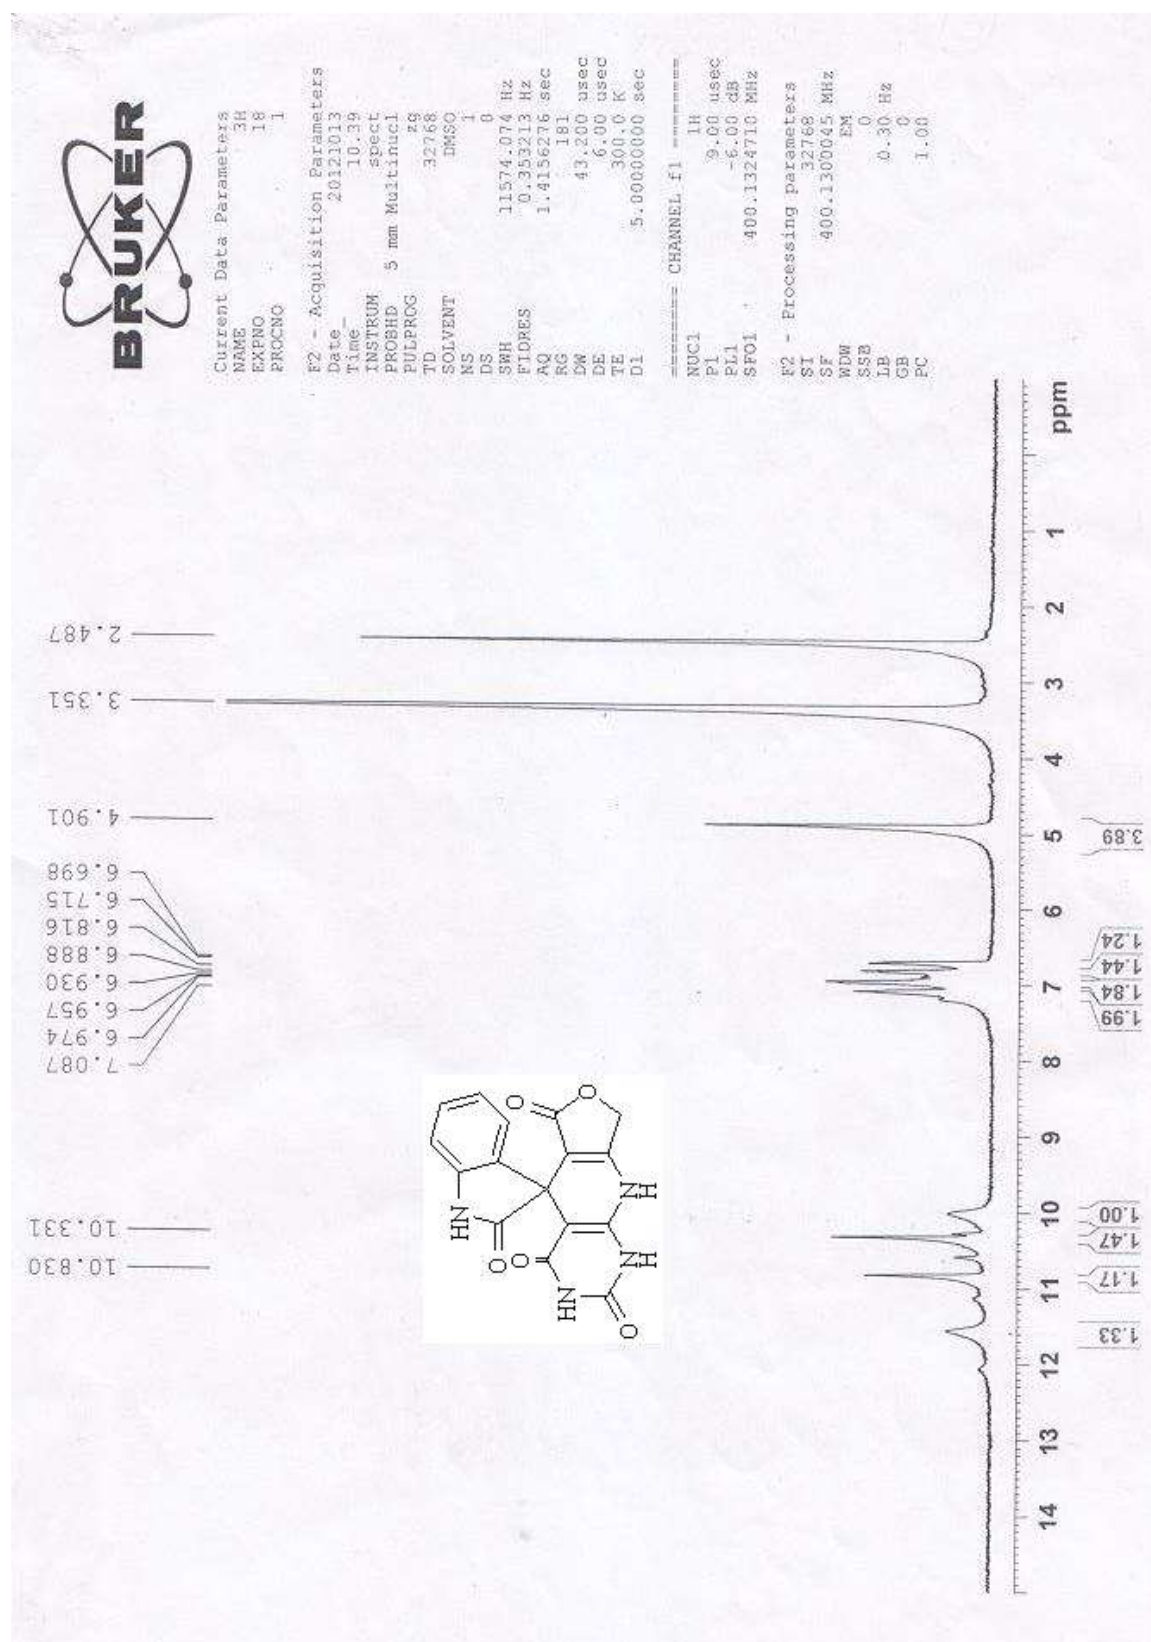

*<sup>1</sup>H NMR spectrum of 1H-spiro[furo[3,4-g]pyrido[2,3-d]pyrimidine-5,3'-indoline]-2,2',4,6(3H,8H,9H)-tetraone (4f):*

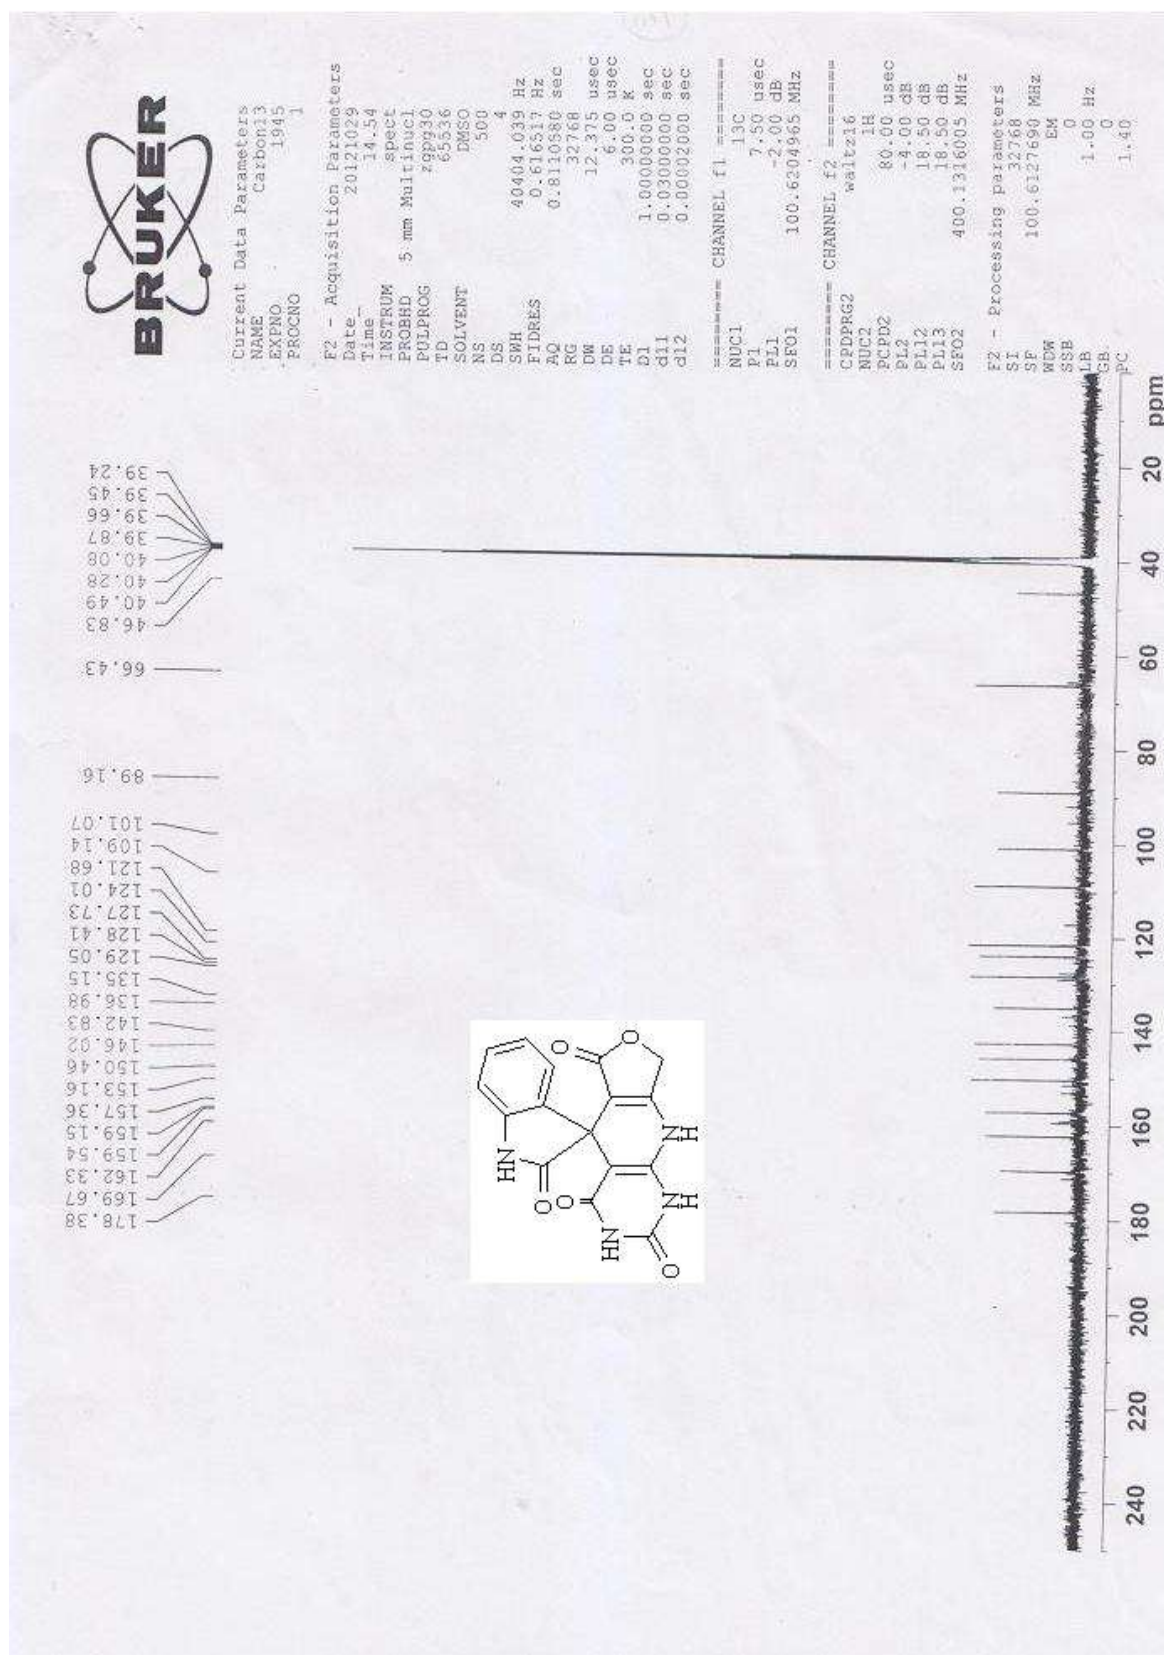

**<sup>13</sup>C NMR spectrum of 1H-spiro[furo[3,4-g]pyrido[2,3-d]pyrimidine-5,3'-indoline]-2,2',4,6(3H,8H,9H)-tetraone (4f):**

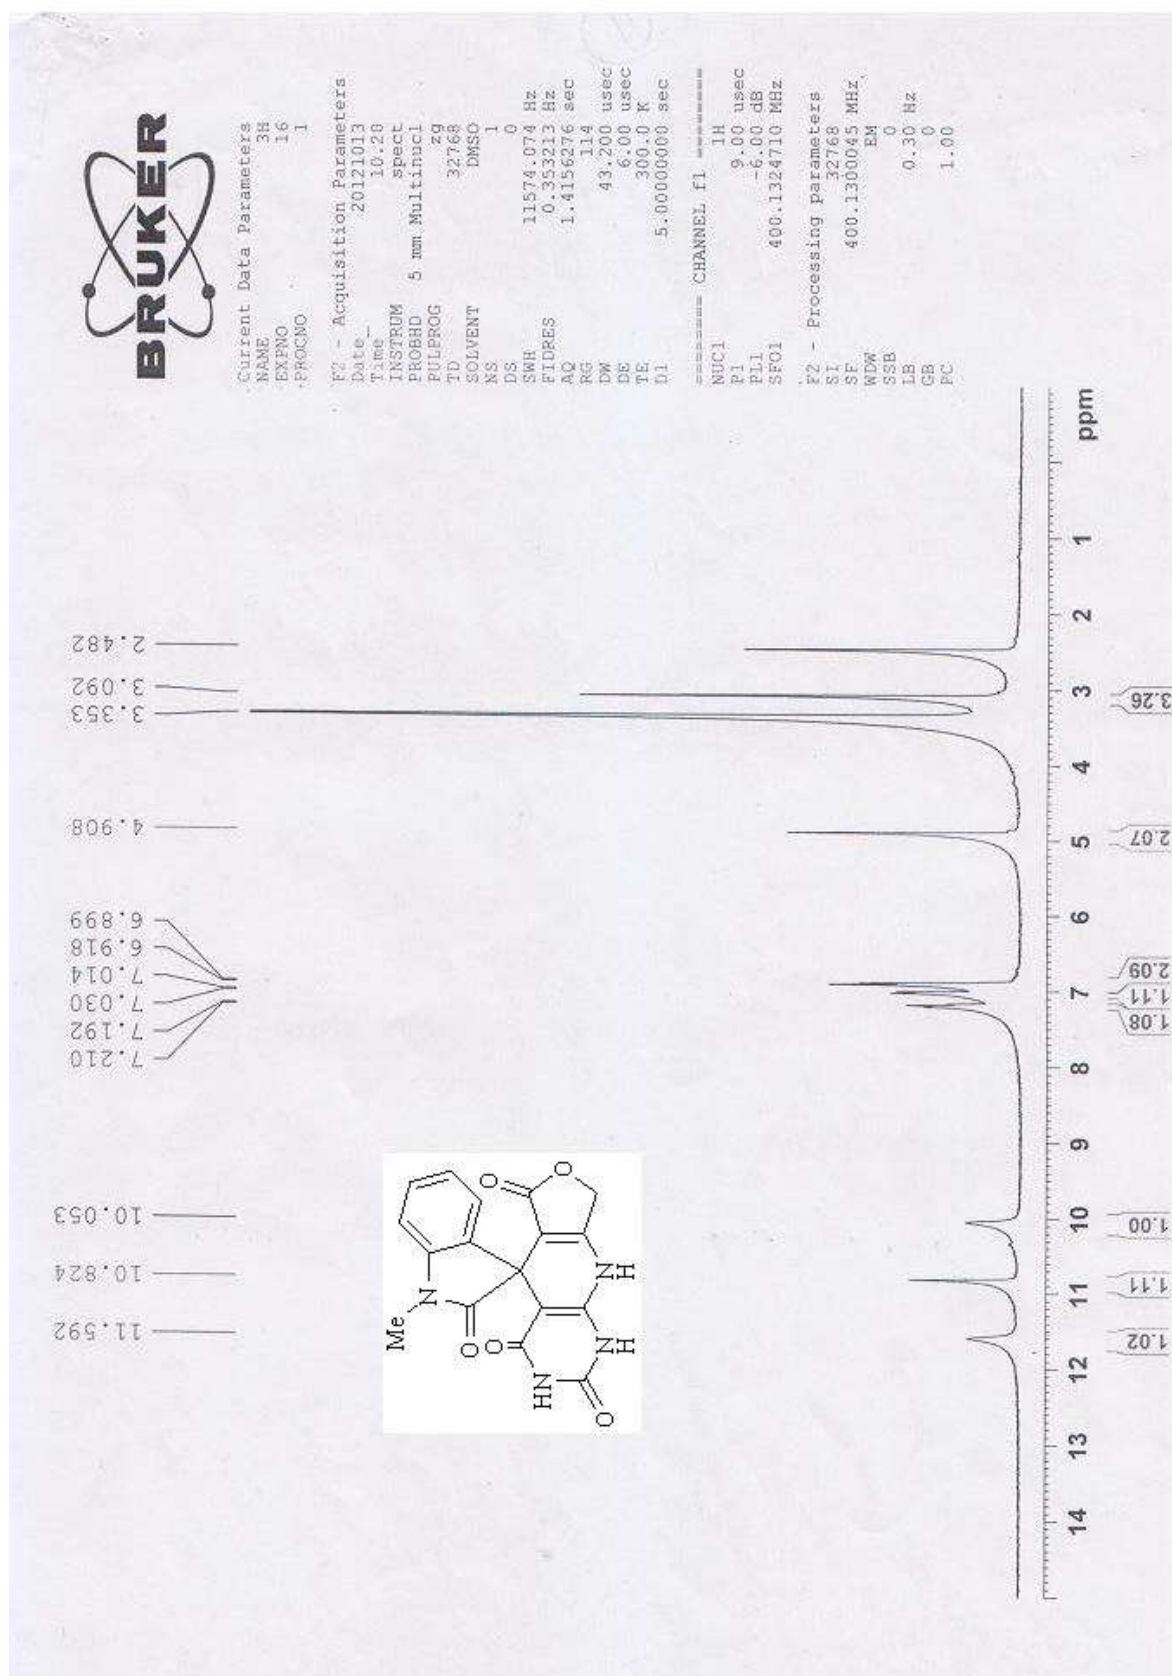

*<sup>1</sup>H NMR spectrum of 1'-methyl-1H-spiro[furo[3,4-g]pyrido[2,3-d]pyrimidine-5,3'-indoline]-2,2',4,6 (3H,8H,9H)-tetraone (4g):*



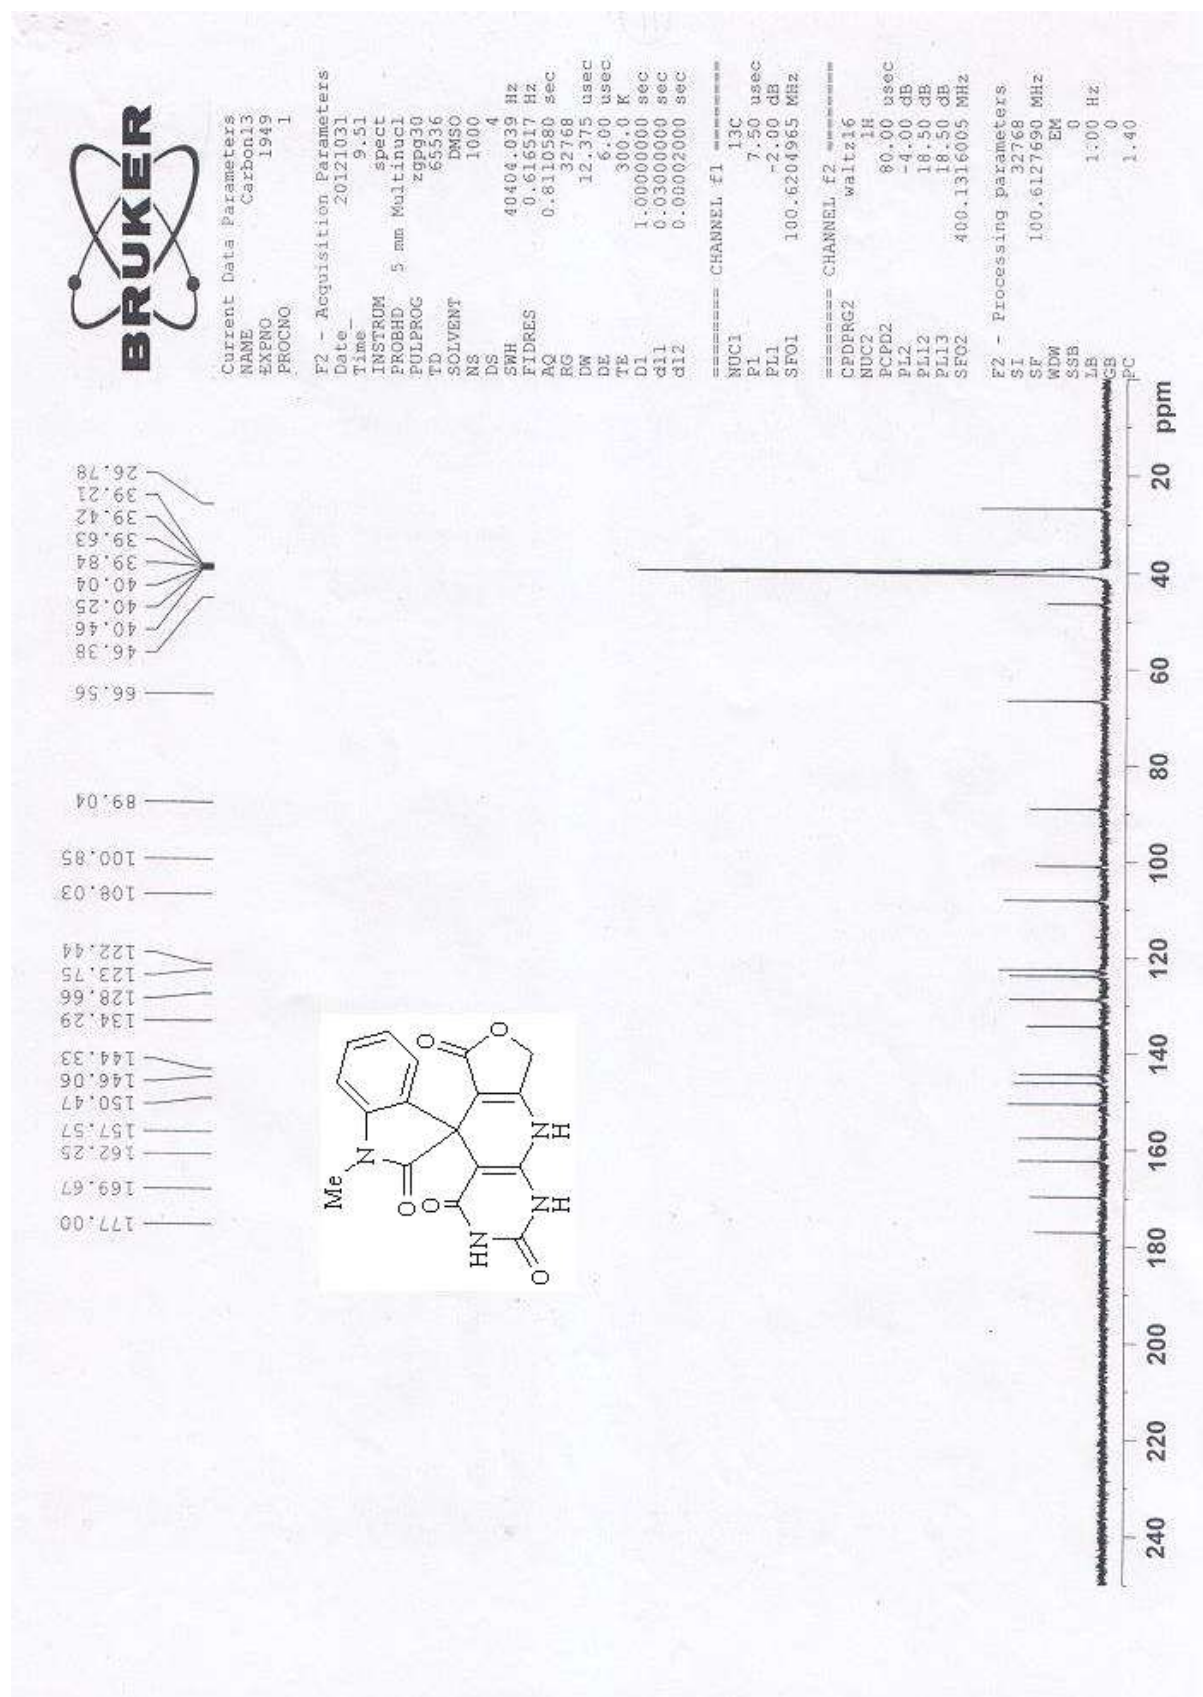

*<sup>13</sup>C NMR spectrum of 1'-methyl-1H-spiro[furo[3,4-g]pyrido[2,3-d]pyrimidine-5,3'-indoline]-2,2',4,6 (3H,8H,9H)-tetraone (4g):*

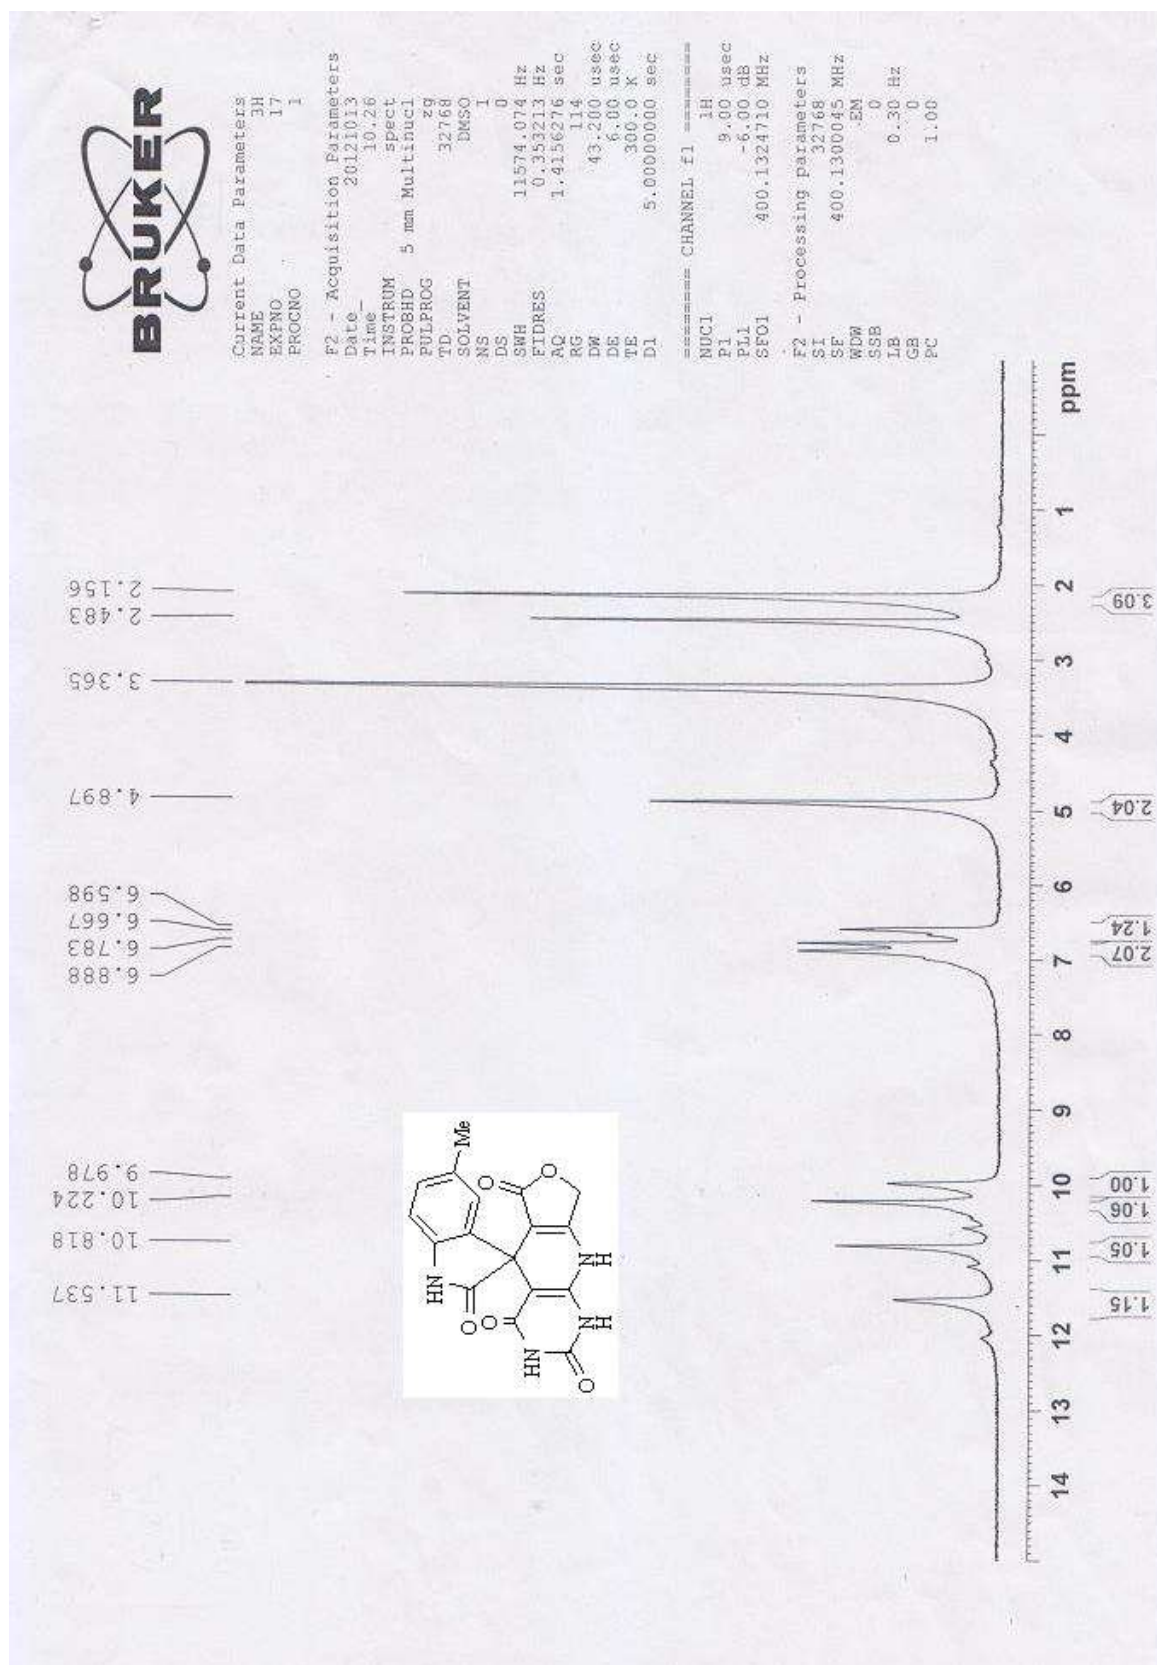

*<sup>1</sup>H NMR spectrum of 5'-methyl-1H-spiro[furo[3,4-g]pyrido[2,3-d]pyrimidine-5,3'-indoline]-2,2',4,6 (3H,8H,9H)-tetraone (4h):*



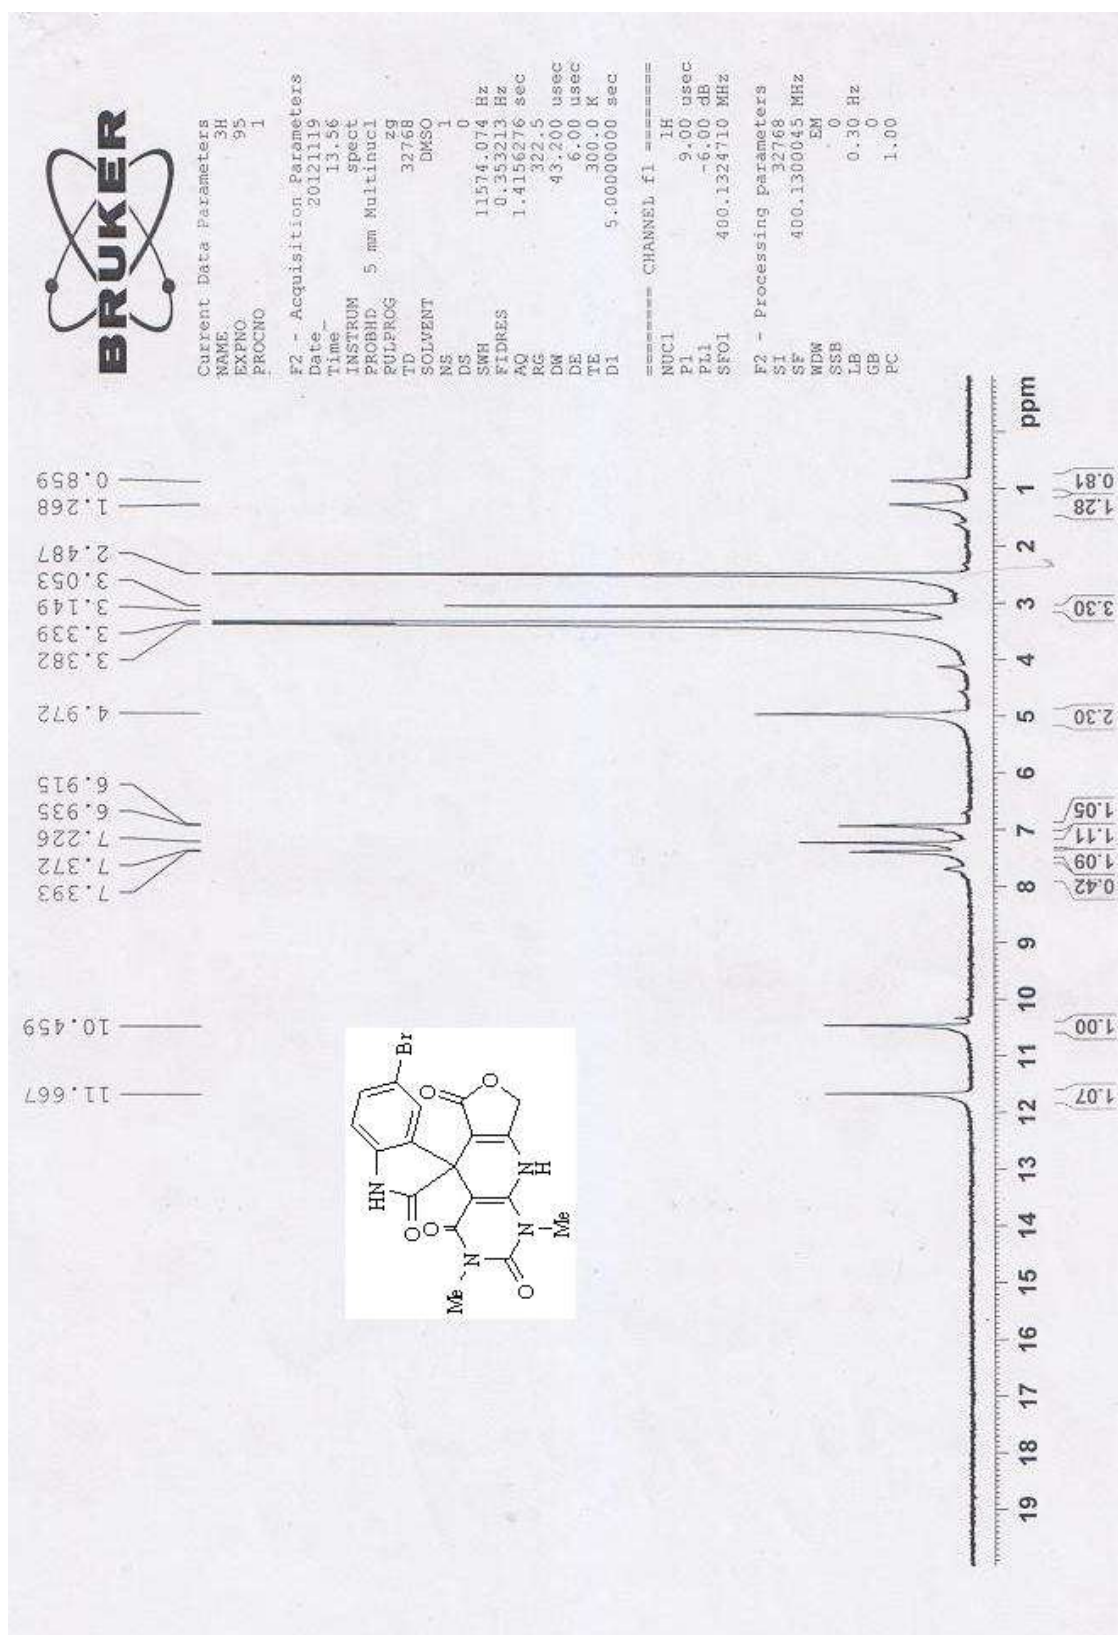

*<sup>1</sup>H NMR spectrum of 5'-bromo-1,3-dimethyl-1H-spiro[furo[3,4-g]pyrido[2,3-d]pyrimidine-5,3'-indoline]-2,2',4,6(3H,8H,9H)-tetraone (4i):*

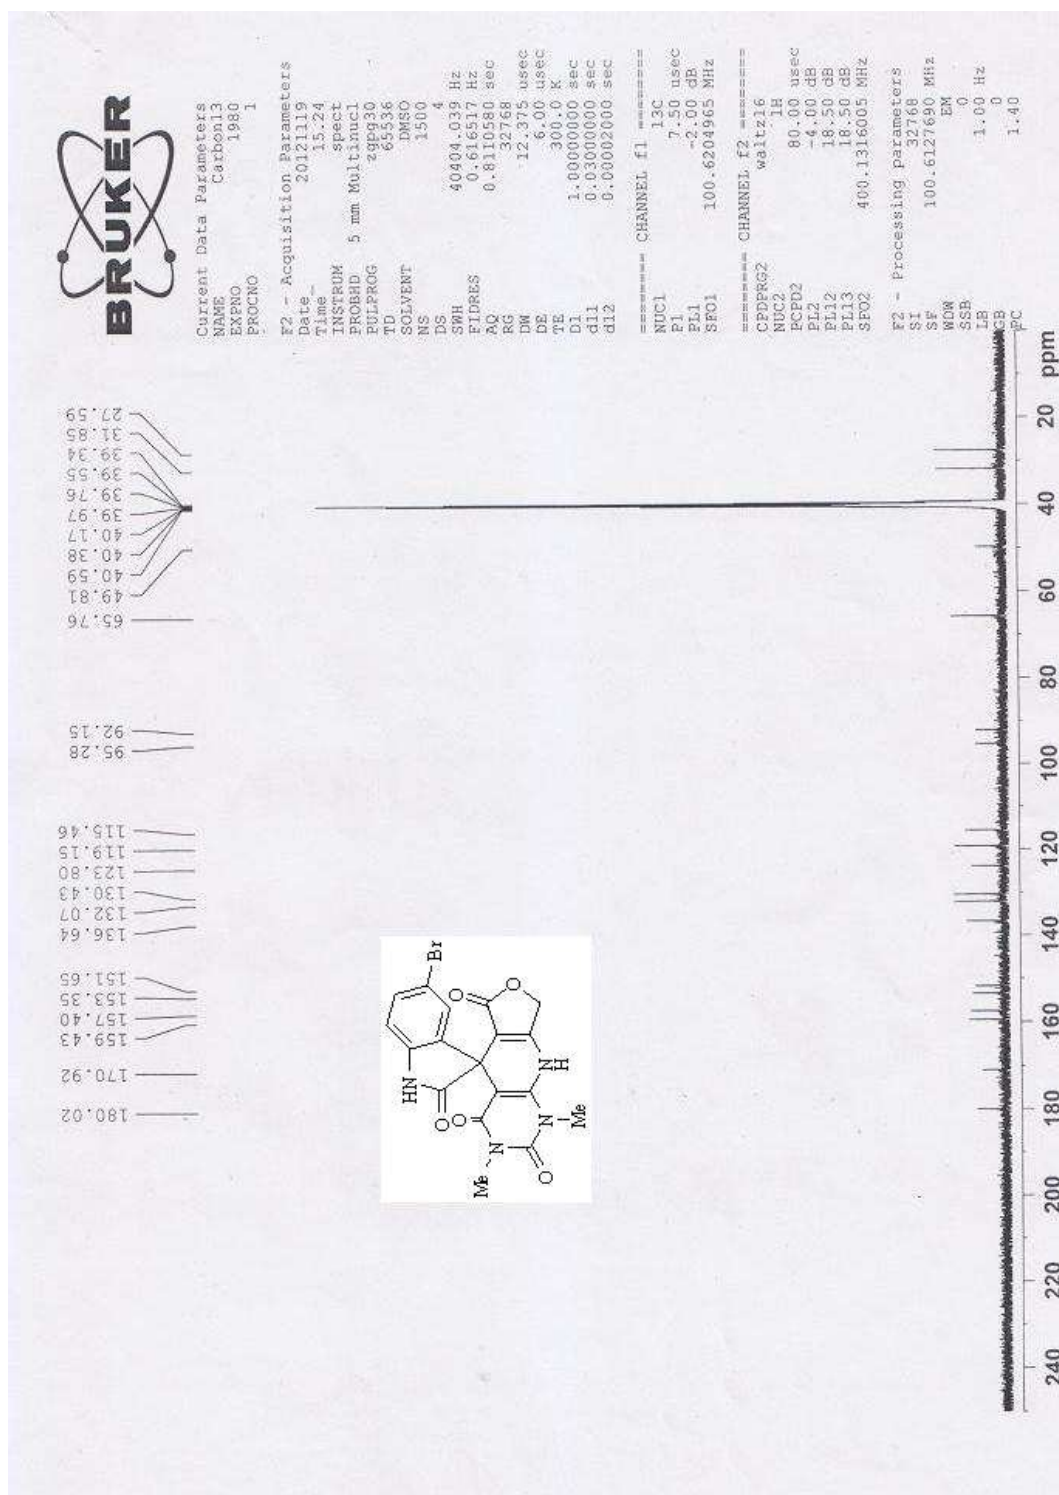

***<sup>13</sup>C NMR spectrum of 5'-bromo-1,3-dimethyl-1H-spiro[furo[3,4-g]pyrido[2,3-d]pyrimidine-5,3'-indoline]-2,2',4,6(3H,8H,9H)-tetraone (4i):***

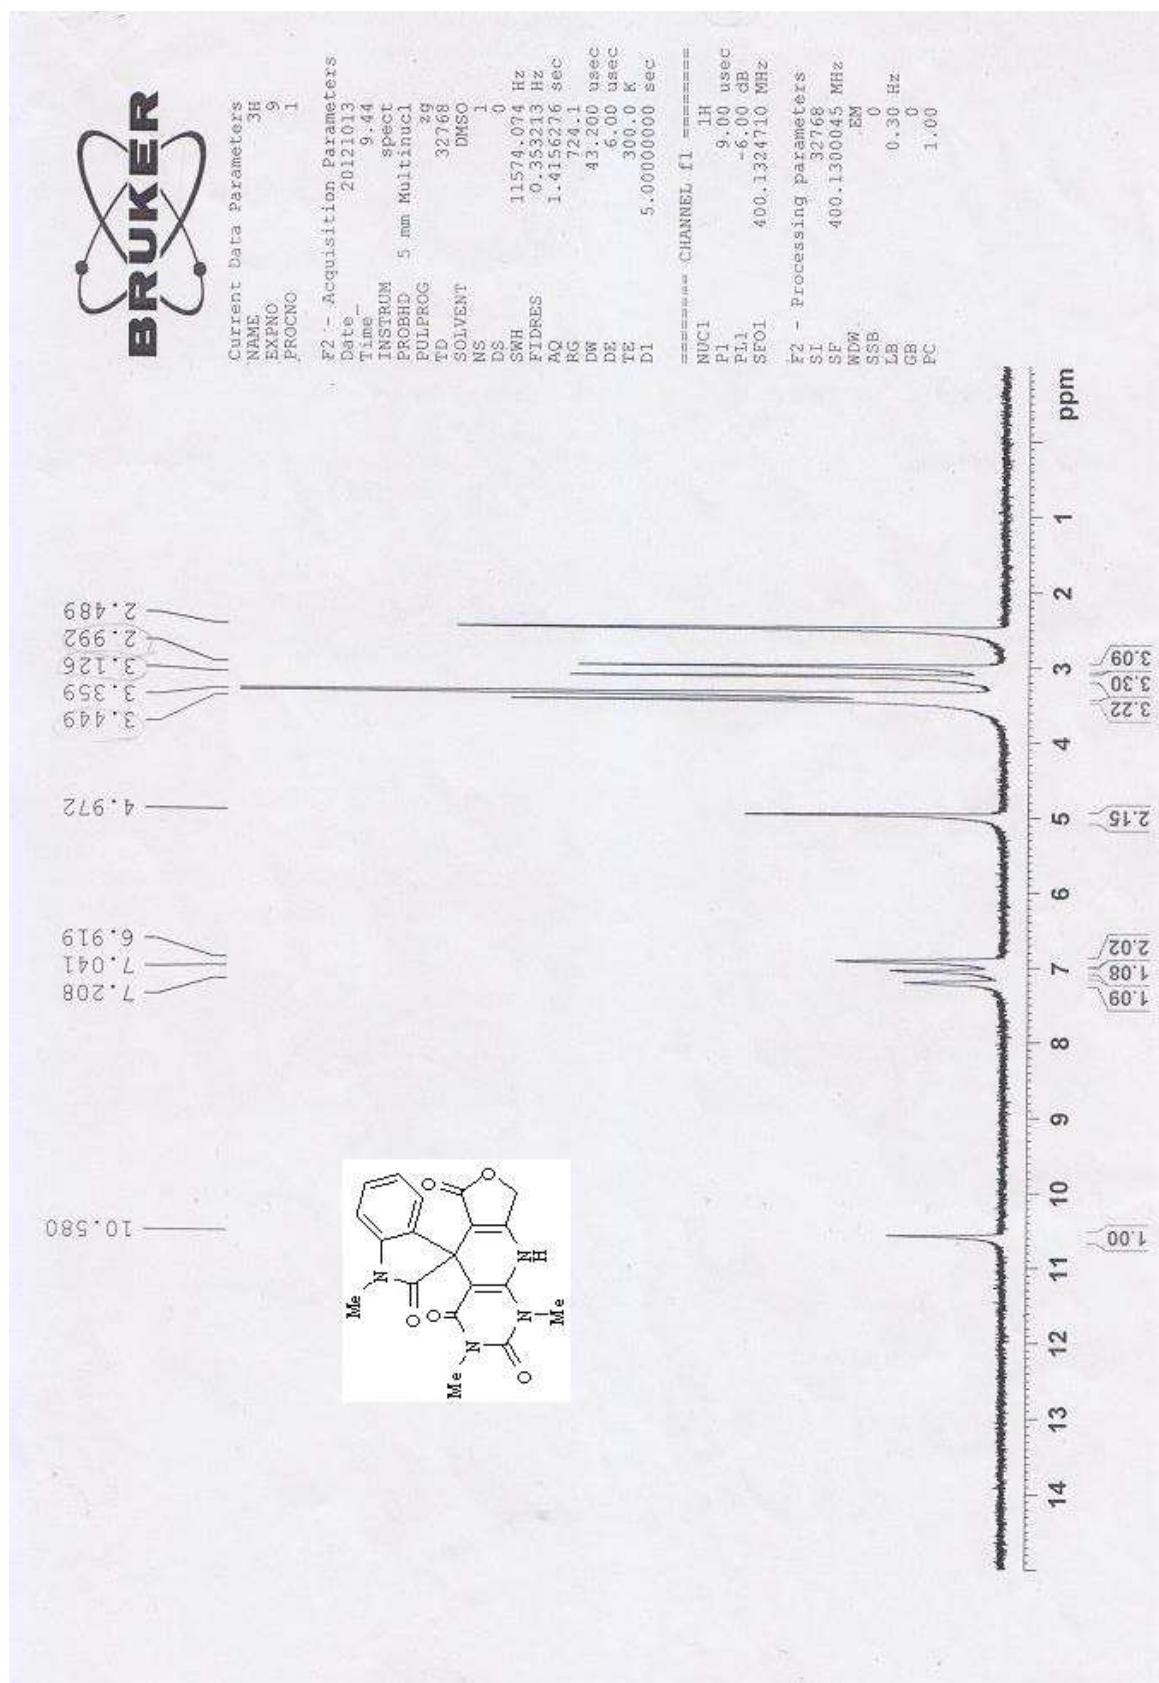

*<sup>1</sup>H NMR spectrum of 1,1',3-trimethyl-1H-spiro[furo[3,4-g]pyrido[2,3-d]pyrimidine-5,3'-indoline] 2,2',4,6(3H,8H,9H)-tetraone (4j):*



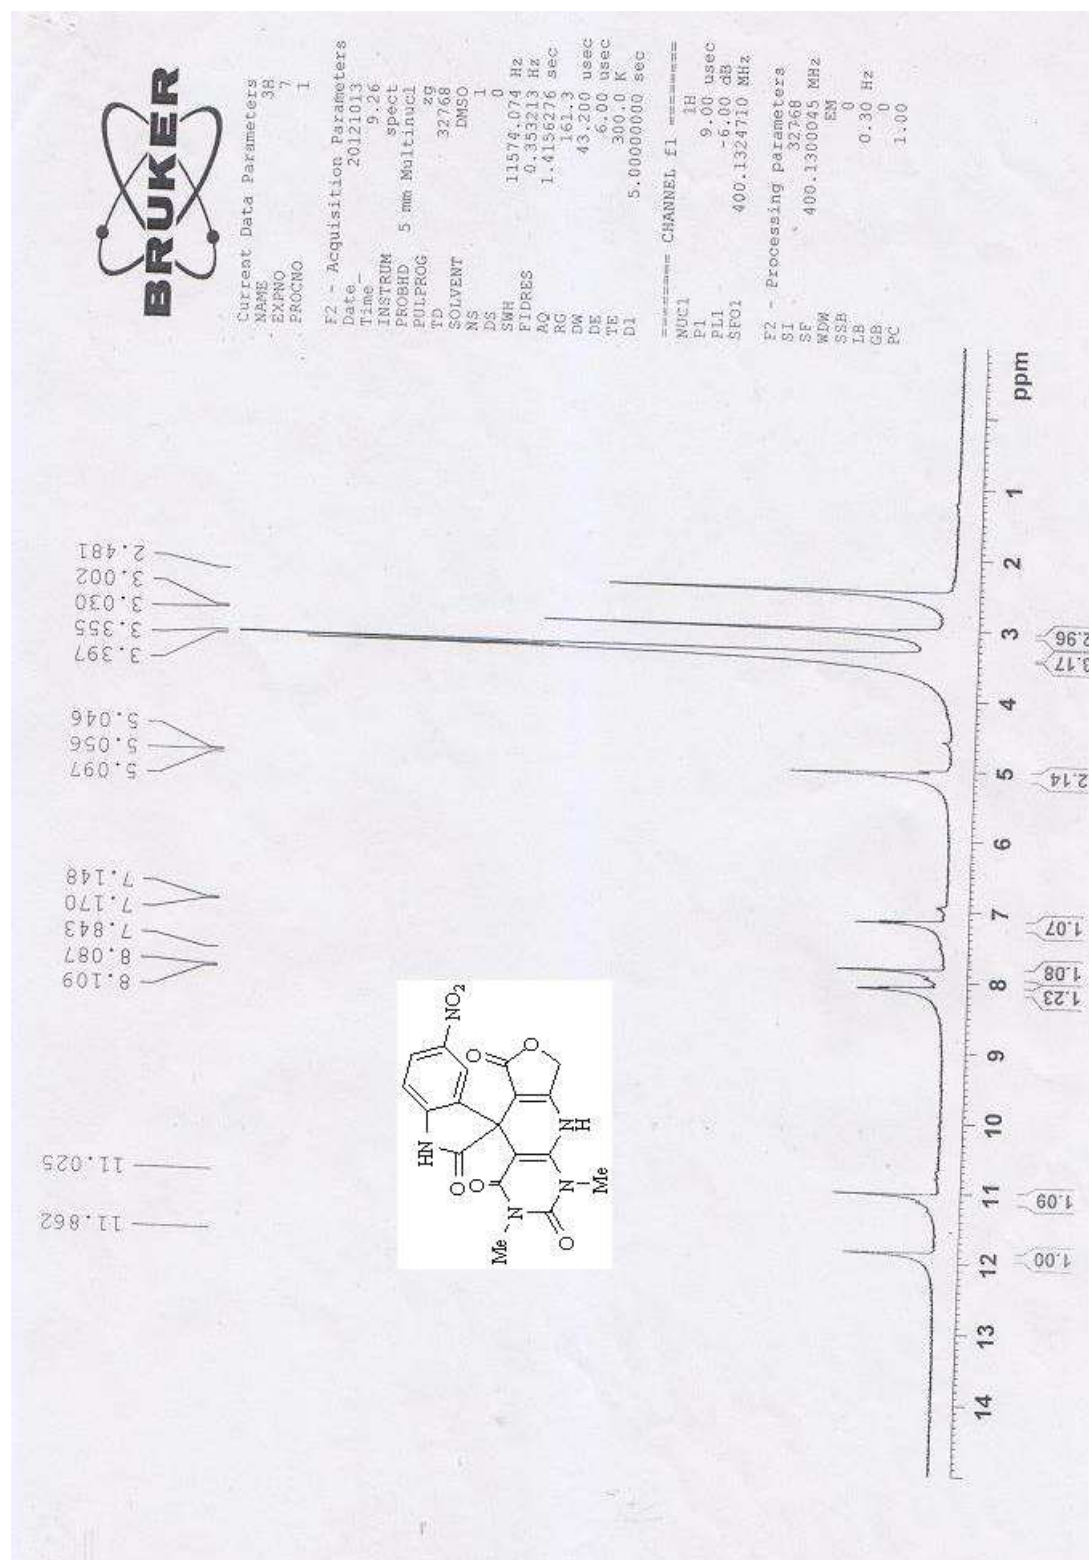

***<sup>1</sup>H NMR spectrum of 1,3-dimethyl-5'-nitro-1H-spiro[furo[3,4-g]pyrido[2,3-d]pyrimidine-5,3'-indoline] 2,2',4,6(3H,8H,9H)-tetraone (4k):***

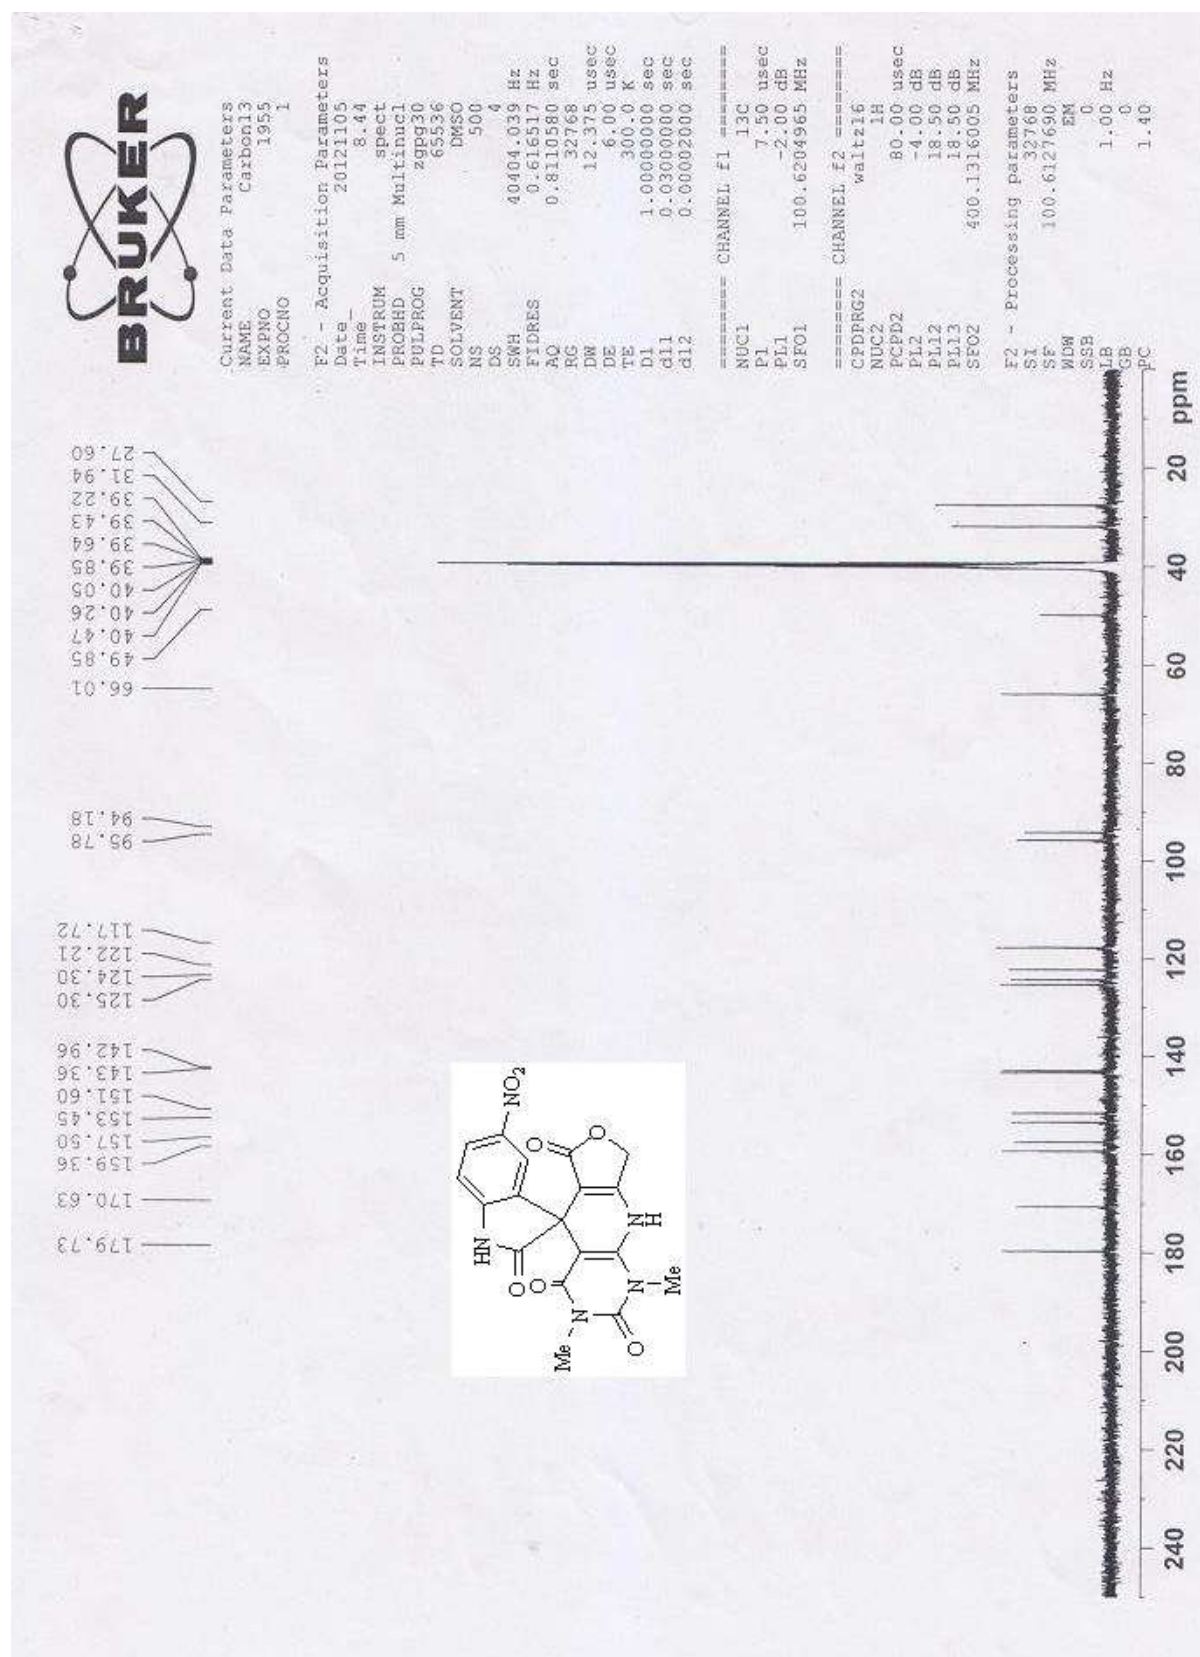

*<sup>13</sup>C NMR spectrum of 1,3-dimethyl-5'-nitro-1H-spiro[furo[3,4-g]pyrido[2,3-d]pyrimidine-5,3'-indoline] 2,2',4,6(3H,8H,9H)-tetraone (4k):*

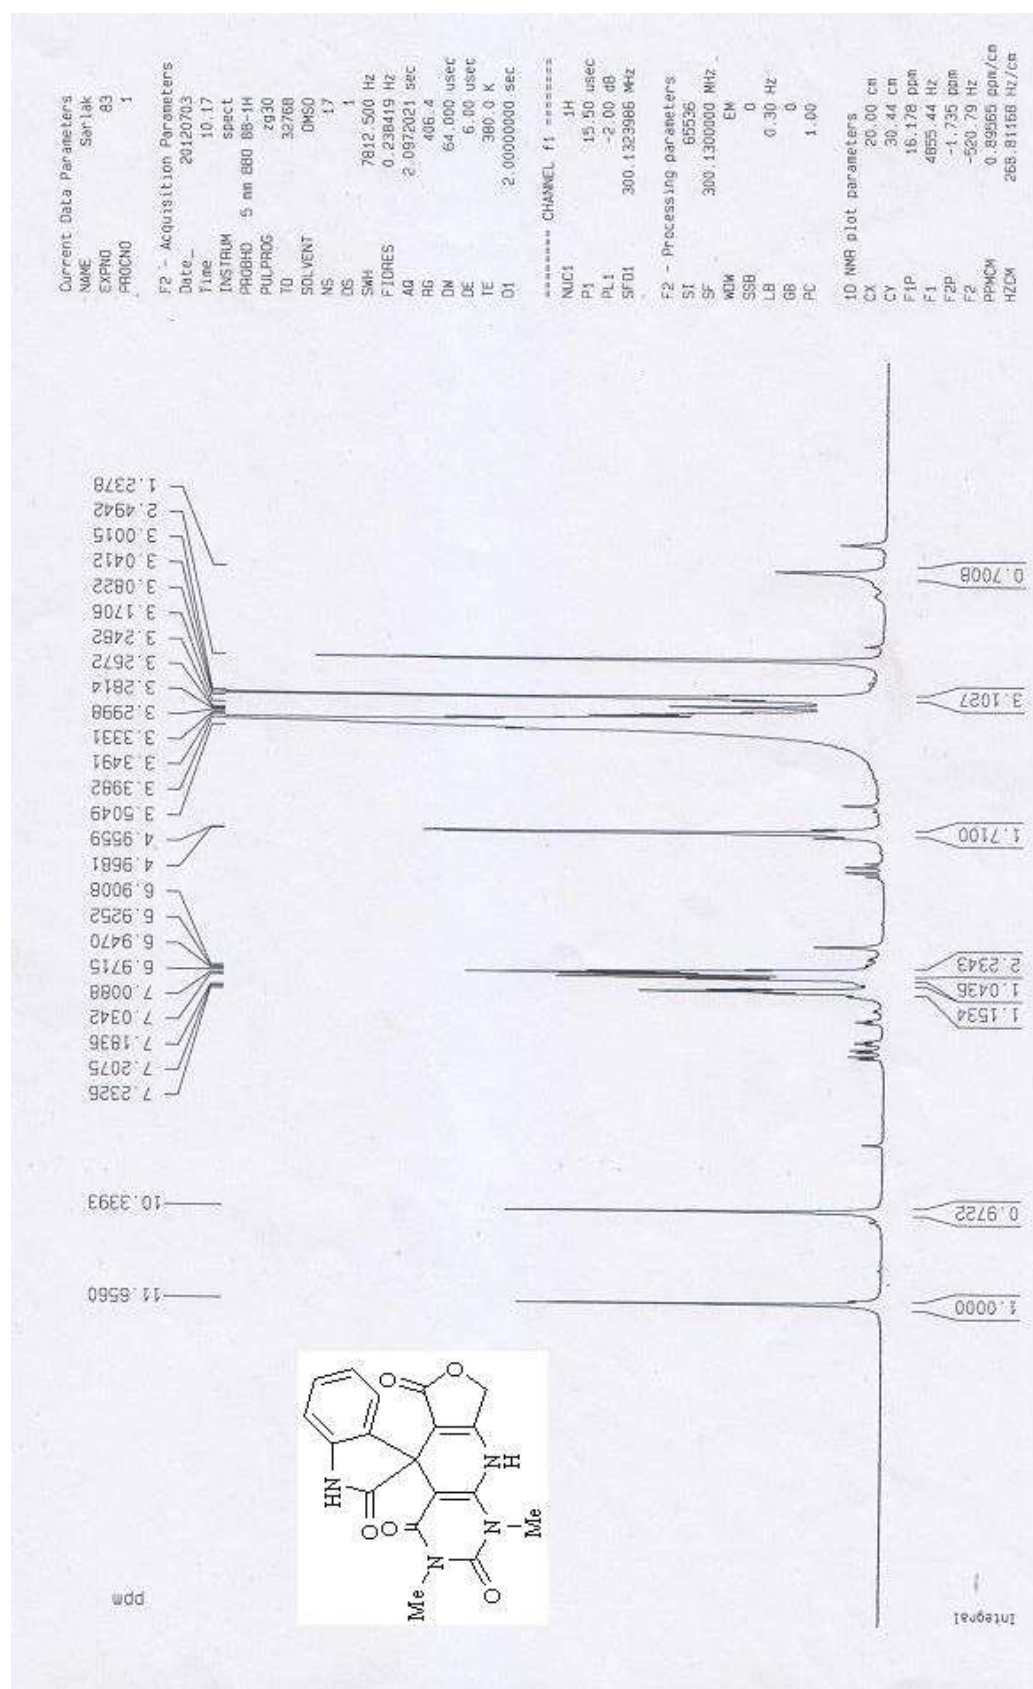

***<sup>1</sup>H NMR of spectrum 1,3-dimethyl-1H-spiro[furo[3,4-g]pyrido[2,3-d]pyrimidine-5,3'-indoline]-2,2',4,6 (3H,8H,9H)-tetraone (4I):***
